# Supplementary material for: Facile synthesis of structurally diverse 5-oxopiperazine-2-carboxylates as dipeptide mimics and templates
Source: Royal Society of Chemistry journal article supplement (doi:10.1039/b908548c), 2009-01-01

## Supporting Information

### Facile synthesis of structurally diverse 5-oxopiperazine-2-carboxylates as dipeptide mimics and templates

Michael Limbach<sup>a</sup>, Alexander V. Lygin,<sup>a</sup> Vadim S. Korotkov,<sup>a</sup> Mazen Es-Sayed<sup>b</sup>  
and Armin de Meijere<sup>\*a</sup>

<sup>a</sup>*Institut für Organische und Biomolekulare Chemie, Georg-August-Universität Göttingen,  
Tammannstrasse 2, 37077 Göttingen, Germany. Fax: + 49(0)551/399475, Email:*

*[ameijer1@gwdg.de](mailto:ameijer1@gwdg.de)*

<sup>b</sup>*Bayer CropScience AG, Alfred-Nobel-Strasse 50, 40789 Monheim, Germany.*

### Table of Contents:

|                                                                                |    |
|--------------------------------------------------------------------------------|----|
| Experimental Data for Prepared Compounds                                       | 3  |
| Preparation and Characterization of Compounds <b>3b</b> , <b>3c</b> .....      | 3  |
| Preparation and Characterization of Compound <b>3d</b> .....                   | 4  |
| Preparation and Characterization of Compound <b>3e</b> .....                   | 5  |
| Preparation and Characterization of Compounds <b>2bf</b> , <b>2bg</b> .....    | 6  |
| Preparation and Characterization of Compounds <b>2bh</b> , <b>2bi</b> .....    | 7  |
| Preparation and Characterization of Compounds <b>2cj-Ph</b> , <b>2dk</b> ..... | 8  |
| Preparation and Characterization of Compound <b>2dl</b> .....                  | 9  |
| Preparation and Characterization of Compounds <b>2dm</b> , <b>2d</b> .....     | 10 |
| Preparation and Characterization of Compound <b>2dn</b> .....                  | 11 |
| Preparation and Characterization of Compound <b>2do</b> .....                  | 12 |
| Preparation and Characterization of Compound <b>6dq</b> .....                  | 13 |
| Preparation and Characterization of Compound <b>2dr</b> .....                  | 14 |
| Preparation and Characterization of Compounds <b>2ds</b> , <b>2dt</b> .....    | 15 |
| Preparation and Characterization of Compound <b>2du</b> .....                  | 16 |
| Preparation and Characterization of Compounds <b>2dv</b> , <b>2ej-Ph</b> ..... | 17 |
| <sup>1</sup> H and <sup>13</sup> C Spectra                                     | 19 |
| Copies of <sup>1</sup> H and <sup>13</sup> C NMR spectra for <b>8</b> .....    | 19 |
| Copies of <sup>1</sup> H and <sup>13</sup> C NMR spectra for <b>3c</b> .....   | 20 |
| Copies of <sup>1</sup> H and <sup>13</sup> C NMR spectra for <b>3d</b> .....   | 21 |
| Copies of <sup>1</sup> H and <sup>13</sup> C NMR spectra for <b>2dl</b> .....  | 22 |
| Copies of <sup>1</sup> H and <sup>13</sup> C NMR spectra for <b>2dd</b> .....  | 23 |
| Copies of <sup>1</sup> H and <sup>13</sup> C NMR spectra for <b>2ds</b> .....  | 24 |
| Copies of <sup>1</sup> H and <sup>13</sup> C NMR spectra for <b>2du</b> .....  | 25 |

**Methyl 2-(1-(2-Bromo-N-(2-methoxyethyl)acetamido)-cyclopropyl)-2-chloroacetate**

**(3b):** To a solution of **1** (454 mg, 3.10 mmol) in THF (20 mL) was added at 0 °C methoxyethylamine (256 mg, 3.41 mmol), and the solution was stirred at this temperature for 5 h. Volatiles were removed under reduced pressure, the residue was taken up in 1,2-dichloroethane (50 mL), bromoacetyl chloride (876 mg, 6.20 mmol) and solid NaHCO<sub>3</sub> (328 mg, 3.10 mmol) were added with stirring at 20 °C and slowly water (1 mL). The suspension was vigorously stirred for 8 h, a saturated NaHCO<sub>3</sub> solution (10 mL) was added, the phases were separated, the aqueous phase was extracted with CH<sub>2</sub>Cl<sub>2</sub> (1 × 50 mL), the combined organic phases were dried over Na<sub>2</sub>SO<sub>4</sub>, and the solvent was removed under reduced pressure. Chromatographic purification of the residue on silica gel (20 g, 2.5 × 14 cm, pentane/Et<sub>2</sub>O 1 : 1, ninhydrine, *R<sub>f</sub>* = 0.29) yielded 636 mg (66%) of **3b** as a colorless oil. – IR (film):  $\nu(\text{tilde}) = 3484, 2887, 2953, 2895, 1752 (\text{C=O}), 1664 (\text{C=O}), 1436, 1398, 1354, 1195, 1167, 1112, 1016, 916, 733 \text{ cm}^{-1}$ . – <sup>1</sup>H NMR (CDCl<sub>3</sub>, 300 MHz, mixture of two rotamers):  $\delta = 1.02\text{--}1.13 (\text{m}, 1 \text{ H}, \text{Cpr-}H), 1.39\text{--}1.47 (\text{m}, 1 \text{ H}, \text{Cpr-}H), 1.52\text{--}1.70 (\text{m}, 2 \text{ H}, \text{Cpr-}H), 3.28 (\text{s}, 1.5 \text{ H}, \text{CH}_3), 3.32 (\text{s}, 1.5 \text{ H}, \text{CH}_3), 3.35 (\text{s}, 1 \text{ H}, \text{CH}_2\text{Br}), 3.38\text{--}3.57 (\text{m}, 1 \text{ H}, \text{CH}_2), 3.57\text{--}3.74 (\text{m}, 1 \text{ H}, \text{CH}_2), 3.77 (\text{s}, 1.5 \text{ H}, \text{CH}_3), 3.79 (\text{s}, 1.5 \text{ H}, \text{CH}_3), 3.82 (\text{s}, 1 \text{ H}, \text{CH}_2\text{Br}), 3.94\text{--}4.06 (\text{m}, 1 \text{ H}), 4.29\text{--}4.40 (\text{m}, 1.5 \text{ H}), 4.84 (\text{s}, 0.5 \text{ H})$ . – <sup>13</sup>C NMR (CDCl<sub>3</sub>, 75.5 MHz, APT):  $\delta = 14.3 (-, \text{Cpr-C}), 14.6 (-, \text{Cpr-C}), 16.9 (-, \text{Cpr-C}), 19.0 (-, \text{Cpr-C}), 27.0 (-, \text{CH}_2), 27.2 (-, \text{CH}_2), 43.1 (\text{C}_{\text{quat}}, \text{Cpr-C}), 43.7 (\text{C}_{\text{quat}}, \text{Cpr-C}), 50.4 (-, \text{NCH}_2), 50.6 (-, \text{NCH}_2), 53.2 (+, \text{CH}), 53.3 (+, \text{CH}), 58.8 (\text{OCH}_3), 58.9 (\text{OCH}_3), 61.3 (\text{OCH}_3), 63.5 (\text{OCH}_3), 69.1 (-, \text{CH}_2), 69.3 (-, \text{CH}_2)$ . – MS (ESI), *m/z* (%): 341.9/343.8 (43/62) [M<sup>+</sup>], 363.9/365.8 (79/100) [M + Na]<sup>+</sup>, 706.4/708.4/710.4 (24/25/5) [2M + Na]<sup>+</sup>. – C<sub>11</sub>H<sub>17</sub>BrClNO<sub>4</sub> (342.6): calcd. C 38.56, H 5.00, N 4.09; found C 38.27, H 4.82, N 3.88.

**Methyl (2-(2-Bromo-2-phenylacetyl)-(methoxymethyl)-amino)cyclopropyl)-2-chloroacetate (3c):**

To a solution of **1** (602 mg, 4.11 mmol) in THF (10 mL) was added at 0 °C glycinemethylester hydrochloride (469 mg, 3.73 mmol) and triethylamine (416 mg, 4.11 mmol), and the solution was stirred under rewarming to 20 °C for 7 h. The precipitate was filtered off, and the filtrate was concentrated under reduced pressure, the residue was taken up in 1,2-dichloroethane (20 mL), 2-bromo-2-phenylacetyl chloride (2.62 g, 11.2 mmol) and dropwise 1 n NaOH (11.2 mL, 11.2 mmol) were added at 0 °C. The suspension was vigorously stirred at 20 °C for 12 h, a saturated NaHCO<sub>3</sub> solution (10 mL)

was added, the phases were separated, the aqueous phase was extracted with  $\text{CH}_2\text{Cl}_2$  ( $3 \times 30$  mL), the combined organic phases were dried over  $\text{Na}_2\text{SO}_4$  and the solvent was removed under reduced pressure. Chromatographic purification of the residue on silica gel (20 g,  $3 \times 20$  cm, pentane/EtOAc 3 : 2, ninhydrine,  $R_f = 0.64$ ) yielded 1.59 g (86%) of **3c** as a colorless oil. – IR (film):  $\nu(\text{tilde}) = 3440, 2954, 2253, 1749$  (C=O), 1664 (C=O), 1438, 1391, 1214, 910, 740  $\text{cm}^{-1}$ . –  $^1\text{H}$  NMR ( $\text{CDCl}_3$ , 300 MHz, mixture of two diastereomers, rotamers):  $\delta = 1.19\text{--}1.47$  (m, 3 H, Cpr-*H*), 1.59–1.73 (m, 1 H, Cpr-*H*), 3.70 (s, 2 H,  $\text{OCH}_3$ ), 3.70 (s, 1 H,  $\text{OCH}_3$ ), 3.79 (s, 1 H,  $\text{OCH}_3$ ), 3.81 (s, 2 H,  $\text{OCH}_3$ ), 3.86–4.08 (m, 2 H), 4.28–4.45 (m, 1.5 H), 4.85 (d,  $J = 85$  Hz, part of AB-system, 0.5 H), 7.10–7.18 (m, 1 H, aryl-*H*), 7.25–7.32 (m, 3 H, aryl-*H*), 7.53–7.59 (m, 1 H, aryl-*H*). –  $^{13}\text{C}$  NMR ( $\text{CDCl}_3$ , 75.5 MHz, APT):  $\delta = 12.0$  (–, Cpr-*C*), 13.5 (–, Cpr-*C*), 17.2 (–, Cpr-*C*), 21.5 (–, Cpr-*C*), 40.9 ( $\text{C}_{\text{quat}}$ , Cpr-*C*), 41.3 ( $\text{C}_{\text{quat}}$ , Cpr-*C*), 42.3 ( $\text{C}_{\text{quat}}$ , Cpr-*C*), 43.5 ( $\text{C}_{\text{quat}}$ , Cpr-*C*), 50.7 (–,  $\text{CH}_2$ ), 51.2 (–,  $\text{CH}_2$ ), 52.2 (+,  $\text{CH}$ ), 52.6 (+,  $\text{CH}$ ), 53.3 (+,  $\text{CH}$ ), 53.4 (+,  $\text{CH}$ ), 124.7 ( $\text{C}_{\text{quat}}$ , aryl-*C*), 124.8 ( $\text{C}_{\text{quat}}$ , aryl-*C*), 127.5 (+, aryl-*C*), 127.6 (+, aryl-*C*), 128.6 (+, aryl-*C*), 128.7 (+, aryl-*C*), 131.2 (+, aryl-*C*), 131.4 (+, aryl-*C*), 132.6 (+, aryl-*C*), 134.7 ( $\text{C}_{\text{quat}}$ , aryl-*C*), 134.9 ( $\text{C}_{\text{quat}}$ , aryl-*C*), 167.1 ( $\text{C}_{\text{quat}}$ ), 168.5 ( $\text{C}_{\text{quat}}$ ), 170.0 ( $\text{C}_{\text{quat}}$ ), 170.1 ( $\text{C}_{\text{quat}}$ ), 171.8 ( $\text{C}_{\text{quat}}$ ), 172.2 ( $\text{C}_{\text{quat}}$ ), 172.3 ( $\text{C}_{\text{quat}}$ ). – MS (ESI),  $m/z$  (%): 454.0/456.0 (82/100)  $[\text{M} + \text{Na}]^+$ , 887.0 (90)  $[2\text{M} + \text{Na}]^+$ . – HRMS (ESI): calcd. for  $\text{C}_{17}\text{H}_{19}\text{BrClNO}_5\text{Na}$   $[\text{M} + \text{Na}^+]$  454.0033; found 454.0027.

**Methyl 2-(1-(*N*-(4-Chlorobenzyl)-2-bromoacetamido)-cyclopropyl)-2-chloroacetate (3d):**

To a solution of **1** (500 mg, 3.41 mmol) in THF (50 mL) was added at 0 °C 4-chlorobenzylamine (531 mg, 3.75 mmol) and triethylamine (380 mg, 3.75 mmol), and the solution was stirred under rewarming to 20 °C for 12 h (Michael adduct, ninhydrine, MTBE/cyclohexane 1 : 1,  $R_f = 0.68$ ). After removal of volatiles under reduced pressure, the residue was taken up in 1,2-dichloroethane (30 mL), bromoacetyl chloride (1.61 g, 10.2 mmol), solid  $\text{NaHCO}_3$  (1.40 g, 3.41 mmol) and dropwise over 30 min water, (10 mL) were added at 0 °C. The suspension was vigorously stirred at 20 °C for 5 h, a saturated  $\text{NaHCO}_3$  solution (10 mL) was added, the phases were separated, the aq. phase was extracted with  $\text{CH}_2\text{Cl}_2$  ( $3 \times 30$  mL), the combined organic phases were dried over  $\text{MgSO}_4$ , and the solvent was removed under reduced pressure. Chromatographic purification of the residue on silica gel (30 g,  $2 \times 15$  cm, MTBE/cyclohexane 1 : 1, ninhydrine,  $R_f = 0.50$ ) yielded 1.01 g (72%) of **3d** as a colorless oil. –  $^1\text{H}$  NMR ( $\text{CDCl}_3$ , 300 MHz, mixture of three rotamers):

$\delta$  = 0.92–1.12 (m, 2 H, Cpr-*H*), 1.18–1.32 (m, 1 H, Cpr-*H*), 1.40–1.70 (m, 1 H, Cpr-*H*), 3.49 (s, 1 H), 3.73 (s, 1 H, CH<sub>3</sub>), 3.75 (s, 2 H, CH<sub>3</sub>), 3.90–4.05 (m, 0.5 H), 4.10–4.50 (m, 2 H), 4.80 – 4.90 (m, 0.5 H), 4.84 (s, 1 H), 6.95–7.10 (m, 2 H, aryl-*H*), 7.15–7.32 (m, 2 H, aryl-*H*). – <sup>13</sup>C NMR (CDCl<sub>3</sub>, 62.9 MHz):  $\delta$  = 13.2 (–, Cpr-*C*), 16.6 (–, Cpr-*C*), 18.8 (–, Cpr-*C*), 26.0 (–, CH<sub>2</sub>), 26.5 (–, CH<sub>2</sub>), 26.7 (–, CH<sub>2</sub>), 27.2 (–, CH<sub>2</sub>), 43.0 (C<sub>quat</sub>, Cpr-*C*), 43.7 (C<sub>quat</sub>, Cpr-*C*), 51.2 (–, NCH<sub>2</sub>), 51.7 (–, NCH<sub>2</sub>), 53.2 (+, CH), 53.4 (+, CH), 53.9 (–, NCH<sub>2</sub>), 61.2 (OCH<sub>3</sub>), 63.5 (OCH<sub>3</sub>), 126.2 (+, aryl-*C*), 127.5 (+, aryl-*C*), 128.0 (+, aryl-*C*), 128.6 (+, aryl-*C*), 128.7 (+, aryl-*C*), 129.3 (C<sub>quat</sub>, aryl-*C*), 132.7 (C<sub>quat</sub>, aryl-*C*), 132.9 (C<sub>quat</sub>, aryl-*C*), 133.4 (C<sub>quat</sub>, aryl-*C*), 136.06 (C<sub>quat</sub>, aryl-*C*), 136.11 (C<sub>quat</sub>, aryl-*C*), 136.2 (C<sub>quat</sub>, aryl-*C*), 167.2 (C<sub>quat</sub>), 167.4 (C<sub>quat</sub>), 167.8 (C<sub>quat</sub>), 168.9 (C<sub>quat</sub>), 169.8 (C<sub>quat</sub>), 169.9 (C<sub>quat</sub>). – MS (ESI), *m/z* (%): 434/432/430 (45/100/60) [M + Na]<sup>+</sup>. – HRMS (ESI): calcd. for C<sub>15</sub>H<sub>17</sub>BrClNO<sub>3</sub> [M + H<sup>+</sup>] 407.9769; found 407.9763.

**Methyl 2-(1-(N-(4-(Trifluoromethyl)benzyl)-2-bromo-2-phenylacetamido)cyclopropyl)-2-chloroacetate (3e):** To a solution of **1** (1.00 g, 6.82 mmol) in THF (20 mL) was added at 0 °C *p*-(trifluoromethyl)benzylamine (1.29 g, 7.38 mmol), and the solution was stirred under rearming to 20 °C for 19 h. Volatiles were removed under reduced pressure, the residue was taken up in 1,2-dichloroethane (20 mL), 2-bromo-2-phenylacetyl chloride (2.15 g, 10.0 mmol) in CH<sub>2</sub>Cl<sub>2</sub> (10 mL) and solid NaHCO<sub>3</sub> (632 mg, 8.00 mmol) were added at 20 °C and slowly water (1 mL). The suspension was vigorously stirred for 17 h at 20 °C, a saturated NaHCO<sub>3</sub> solution (10 mL) was added, the phases were separated, the aqueous phase was extracted with CH<sub>2</sub>Cl<sub>2</sub> (3 × 50 mL), the combined organic phases were dried over Na<sub>2</sub>SO<sub>4</sub>, and the solvent was removed under reduced pressure. Chromatographic purification of the residue on silica gel (20 g, 3 × 20 cm, cyclohexane/Et<sub>2</sub>O 3 : 2 → 1 : 1, ninhydrine, *R*<sub>f</sub> = 0.35) yielded 2.90 g (80%) of **3e** as a colorless oil. – IR (film):  $\nu$ (tilde) = 1752 (C=O), 1669 (C=O), 1438, 1395, 1327, 1165, 1125, 1068, 1027, 1016, 911, 733 cm<sup>-1</sup>. – <sup>1</sup>H NMR (CDCl<sub>3</sub>, 300 MHz, mixture of two diastereomers, rotamers):  $\delta$  = 0.97–1.16 (m, 2 H, Cpr-*H*), 1.25–1.41 (m, 1 H, Cpr-*H*), 1.52–1.79 (m, 2 H, Cpr-*H*), 3.50 (d, *J* = 16.6 Hz, 0.5 H), 3.71 (s, 2 H, CH<sub>3</sub>), 3.81 (s, 1 H, CH<sub>3</sub>), 3.92–4.09 (m, 0.5 H), 4.23 (d, *J* = 16.6 Hz, 0.5 H), 4.40–4.58 (m, 0.5 H), 4.90 (d, *J* = 87 Hz, 0.6 H, PhCH<sub>2</sub>), 5.01 (s, 1.4 H, PhCH<sub>2</sub>), 7.06–7.17 (m, 1.5 H, aryl-*H*), 7.19–7.31 (m, 4 H, aryl-*H*), 7.47–7.59 (m, 2 H, aryl-*H*), 7.64 (d, *J* = 8.3 Hz, 1.5 H, aryl-*H*). – <sup>13</sup>C NMR (CDCl<sub>3</sub>, 75.5 MHz, APT):  $\delta$  = 11.4 (–, Cpr-*C*), 12.9 (–, Cpr-*C*), 16.8 (–, Cpr-*C*),

21.3 (–, Cpr-C), 41.9 (C<sub>quat</sub>, Cpr-C), 43.7 (C<sub>quat</sub>, Cpr-C), 53.2 (+, 2 C, CH), 53.3 (+, CH), 53.4 (+, CH), 54.2 (–, NCH<sub>2</sub>), 58.7 (OCH<sub>3</sub>), 63.8 (OCH<sub>3</sub>), 122.1 (C<sub>quat</sub>, aryl-C), 124.7 (C<sub>quat</sub>, aryl-C), 125.4 (+, aryl-C), 125.5 (+, aryl-C), 125.9 (+, aryl-C), 126.4 (+, aryl-C), 127.5 (+, aryl-C), 128.7 (+, aryl-C), 131.5 (+, aryl-C), 132.6 (+, aryl-C) 129.3 (C<sub>quat</sub>, aryl-C), 134.5 (C<sub>quat</sub>, aryl-C), 142.3 (C<sub>quat</sub>, aryl-C), 167.0 (C<sub>quat</sub>), 168.1 (C<sub>quat</sub>), 168.6 (C<sub>quat</sub>), 172.4 (C<sub>quat</sub>). – MS (ESI), *m/z* (%): 542.0 (73) [M + Na]<sup>+</sup>, 1059.0 (100) [2M + Na]<sup>+</sup>. – C<sub>22</sub>H<sub>20</sub>BrClF<sub>3</sub>NO<sub>3</sub> (518.7): calcd. C 50.94, H 3.89, N 2.70; found C 50.72, H 3.67, N 2.82.

**Methyl 7-Benzyl-4-(2-methoxyethyl)-5-oxo-4,7-diazaspiro-[2.5]octane-8-carboxylate (2bf):** The crude product from **3b** (1.15 g, 3.36 mmol), benzylamine (396 mg, 3.69 mmol) and triethylamine (1.02 g, 10.1 mmol) was purified by chromatography on 50 g of silica gel (3 × 20 cm, MOPS, pentane/Et<sub>2</sub>O 1 : 1 → 0 : 1; *R<sub>f</sub>* = 0.23) to yield 898 g (81%) of **2bf** as a colorless oil. – IR (film):  $\nu(\text{tilde}) = 3315, 2951, 2836, 1743$  (C=O), 1678 (C=O), 1517, 1437, 1253, 1036, 879, 846 cm<sup>-1</sup>. – <sup>1</sup>H NMR (CDCl<sub>3</sub>, 250 MHz):  $\delta = 0.60\text{--}0.80$  (m, 1 H, Cpr-*H*), 0.81–1.01 (m, 2 H, Cpr-*H*), 1.25–1.40 (m, 1 H, Cpr-*H*), 1.68 (s, 1 H, CH), 2.85–3.00 (m, 1 H, CH<sub>2</sub>), 3.22–3.46 (m, 5 H, CH<sub>3</sub>, CH<sub>2</sub>), 3.52–3.81 (m, 8 H), 7.18–7.40 (s, 5 H, aryl-*H*). – <sup>13</sup>C NMR (CDCl<sub>3</sub>, 62.9 MHz):  $\delta = 9.45$  (–, Cpr-C), 12.7 (–, Cpr-C), 41.1 (–, 2 C, C<sub>quat</sub>, Cpr-C, CH<sub>2</sub>), 51.5 (–, PhCH<sub>2</sub>), 53.8 (–, CH<sub>2</sub>), 58.8 (+, OCH<sub>3</sub>), 58.9 (+, OCH<sub>3</sub>), 66.1 (+, CHN), 70.0 (–, OCH<sub>2</sub>), 127.5 (+, CH, aryl-C), 128.4 (+, 2 C, aryl-C), 128.8 (+, 2 C, aryl-C), 136.9 (C<sub>quat</sub>, aryl-C), 169.6 (C<sub>quat</sub>, CN=O), 171.0 (C<sub>quat</sub>, C=O). – MS (EI, 70 eV), *m/z* (%): 333/332 (2/5) [M]<sup>+</sup>, 274/273 (14/88), 91 (100). – C<sub>18</sub>H<sub>24</sub>N<sub>2</sub>O<sub>4</sub> (332.4): calcd. C 65.04, H 7.28, N 8.43; found C 65.21, H 7.44, N 8.59.

**Methyl 4-(2-Methoxyethyl)-5-oxo-7-m-tolyl-4,7-diazaspiro-[2.5]octane-8-carboxylate (2bg):** The crude product from **3b** (1.02 g, 2.99 mmol), 3-methylaniline (384 mg, 3.58 mmol) and triethylamine (906 mg, 2.96 mmol) was purified by chromatography on 50 g of silica gel (3 × 20 cm, MOPS, pentane/Et<sub>2</sub>O 1 : 1 → 0 : 1; *R<sub>f</sub>* = 0.45) to yield 793 g (80%) of **2bg** as a colorless solid, m.p. 115–116°C – IR (film):  $\nu(\text{tilde}) = 3330, 3027, 2951, 1735$  (C=O), 1654 (C=O), 1452, 1429, 1396, 1200, 1176, 1031, 732, 700 cm<sup>-1</sup>. – <sup>1</sup>H NMR (CDCl<sub>3</sub>, 250 MHz):  $\delta = 0.86\text{--}0.92$  (m, 2 H, Cpr-*H*), 1.21–1.33 (m, 1 H, Cpr-*H*), 1.59–1.69 (m, 1 H, Cpr-*H*), 2.31 (s, 3 H, CH<sub>3</sub>), 3.29 (s, 3 H, OCH<sub>3</sub>), 3.32–3.46 (m, 4 H, OCH<sub>2</sub>, NCH<sub>2</sub>), 3.49 (s, 1 H, CH), 3.72 (s, 3 H, OCH<sub>3</sub>), 4.20 (s, 2 H, CH<sub>2</sub>), 6.38 (d, <sup>3</sup>*J* = 3.6 Hz, 1 H, aryl-*H*), 6.38 (s, 1 H, aryl-*H*),

6.63 (d,  $^3J = 3.6$  Hz, 1 H, aryl-*H*), 7.14 (t,  $^3J = 3.8$  Hz, 1 H, aryl-*H*). –  $^{13}\text{C}$  NMR ( $\text{CDCl}_3$ , 62.9 MHz):  $\delta = 10.1$  (–, Cpr-*C*), 14.0 (–, Cpr-*C*), 21.8 (+,  $\text{CH}_3$ ), 41.8 ( $\text{C}_{\text{quat}}$ , Cpr-*C*), 43.4 (–,  $\text{NCH}_2$ ), 50.2 (–,  $\text{NCH}_2$ ), 52.4 (+,  $\text{OCH}_3$ ), 58.8 (+,  $\text{OCH}_3$ ), 64.9 (+,  $\text{CHN}$ ), 70.3 (–,  $\text{OCH}_2$ ), 108.6 (+, aryl-*C*), 112.2 (+, aryl-*C*), 119.1 (+, aryl-*C*), 129.3 (+, aryl-*C*), 139.3 ( $\text{C}_{\text{quat}}$ , aryl-*C*), 146.8 ( $\text{C}_{\text{quat}}$ , aryl-*C*), 169.6 ( $\text{C}_{\text{quat}}$ ,  $\text{CN}=\text{O}$ ), 171.9 ( $\text{C}_{\text{quat}}$ ,  $\text{C}=\text{O}$ ). –  $\text{C}_{18}\text{H}_{24}\text{N}_2\text{O}_4$  (332.4): calcd. C 65.04, H 7.28, N 8.43; found C 64.93, H 7.41, N 8.57.

**Methyl 7-(4-Phenylphenyl)-4-(2-methoxyethyl)-5-oxo-4,7-diazaspiro[2.5]octane-8-carboxylate (2bh):** The crude product from **3b** (1.04 g, 3.02 mmol), 4-phenylaniline (614 mg, 3.63 mmol) and triethylamine (918 mg, 9.07 mmol) was purified by chromatography on 50 g of silica gel ( $3 \times 20$  cm,  $\text{Et}_2\text{O}$ ,  $R_f = 0.22$ ) to yield 1.03 g (87%) of **2bh** as a colorless solid, m.p. 129–130 °C. – IR (KBr):  $\nu(\text{tilde}) = 3197, 3082, 2945, 1674$  ( $\text{C}=\text{O}$ ), 1464, 1437, 1414, 1344, 1318, 1144, 1101, 750, 600  $\text{cm}^{-1}$ . –  $^1\text{H}$  NMR ( $\text{CDCl}_3$ , 250 MHz):  $\delta = 0.89\text{--}0.96$  (m, 2 H, Cpr-*H*), 1.21–1.36 (m, 1 H, Cpr-*H*), 1.62–1.72 (m, 1 H, Cpr-*H*), 3.31–3.48 (m, 4 H, 2  $\text{CH}_2$ ), 3.54 (s, 1 H,  $\text{CH}$ ), 3.74 (s, 3 H,  $\text{CH}_3$ ), 4.26 (d,  $J = 2.8$  Hz, 2 H,  $\text{PhCH}_2$ ), 6.65 (d,  $J = 7.2$  Hz, 2 H, aryl-*H*), 6.24–6.30 (m, 1 H, aryl-*H*), 7.40 (t,  $J = 7.2$  Hz, 2 H, aryl-*H*), 7.50–7.58 (t,  $J = 7.2$  Hz, 4 H, aryl-*H*). –  $^{13}\text{C}$  NMR ( $\text{CDCl}_3$ , 62.9 MHz):  $\delta = 10.1$  (–, Cpr-*C*), 14.0 (–, Cpr-*C*), 41.8 ( $\text{C}_{\text{quat}}$ , Cpr-*C*), 43.5 (–,  $\text{CH}_2$ ), 50.2 (–,  $\text{CH}_2$ ), 52.5 (+,  $\text{NCH}_3$ ), 58.8 (+,  $\text{OCH}_3$ ), 64.9 (+,  $\text{CHN}$ ), 70.3 (–,  $\text{OCH}_2$ ), 107.6 (+, aryl-*C*), 111.7 (+, 2 C, aryl-*C*), 126.3 (+, 2 C, aryl-*C*), 128.0 (+, 2 C, aryl-*C*), 128.6 (+, 2 C, aryl-*C*), 131.0 (+, aryl-*C*), 140.6 ( $\text{C}_{\text{quat}}$ , aryl-*C*), 146.0 ( $\text{C}_{\text{quat}}$ , aryl-*C*), 169.4 ( $\text{C}_{\text{quat}}$ ,  $\text{CN}=\text{O}$ ), 171.7 ( $\text{C}_{\text{quat}}$ ,  $\text{C}=\text{O}$ ). – MS (ESI),  $m/z$  (%): 417.2 (91)  $[\text{M}+\text{Na}]^+$ , 811.4 (100)  $[2\text{M}+\text{Na}]^+$ . –  $\text{C}_{23}\text{H}_{26}\text{N}_2\text{O}_4$  (394.5): calcd. C 70.03, H 6.64, N 7.10; found C 70.25, H 6.74, N 7.29.

**Methyl 4-(2-Methoxyethyl)-5-oxo-7-o-tolyl-4,7-diazaspiro-[2.5]octane-8-carboxylate (2bi):** The crude product from **3b** (1.14 g, 3.32 mmol), 2-methylaniline (427 mg, 3.99 mmol) and triethylamine (1.01 g, 9.97 mmol) was purified by chromatography on 50 g of silica gel ( $3 \times 20$  cm, MOPS, pentane/ $\text{Et}_2\text{O}$  1 : 1  $\rightarrow$  0 : 1;  $R_f = 0.43$ ) to yield 838 g (76%) of **2bi** as a colorless oil. – IR (film):  $\nu(\text{tilde}) = 3264, 2957, 2929, 2870, 1676$  ( $\text{C}=\text{O}$ ), 1641 ( $\text{C}=\text{O}$ ), 1460, 1423, 1326, 1235, 1042, 938, 795, 720, 607  $\text{cm}^{-1}$ . –  $^1\text{H}$  NMR ( $\text{CDCl}_3$ , 250 MHz):  $\delta = 0.92\text{--}1.20$  (m, 3 H, Cpr-*H*), 1.47–1.51 (m, 1 H, Cpr-*H*), 2.28 (s, 3 H,  $\text{CH}_3$ ), 3.15–3.75 (m, 9 H), 3.96 (d,  $^3J = 7.96$  Hz, A-part of an AB-system, 1 H,  $\text{CH}_2$ ), 4.20 (d,  $^3J = 7.96$  Hz, B-part

of an AB-system, 1 H,  $CH_2$ ), 7.00–7.26 (m, 4 H, aryl-*H*). –  $^{13}C$  NMR ( $CDCl_3$ , 62.9 MHz):  $\delta$  = 9.4 (–, Cpr-*C*), 13.5 (–, Cpr-*C*), 18.2 (+,  $CH_3$ ), 41.4 ( $C_{quat}$ , Cpr-*C*), 42.1 (–,  $NCH_2$ ), 51.8 (–,  $OCH_2$ ), 53.0 (+,  $OCH_3$ ), 58.8 (+,  $OCH_3$ ), 67.5 (+,  $CHN$ ), 70.3 (–,  $OCH_2$ ), 122.5 (+, aryl-*C*), 124.6 (+, aryl-*C*), 126.7 (+, aryl-*C*), 131.4 (+, aryl-*C*), 133.8 ( $C_{quat}$ , aryl-*C*), 147.4 ( $C_{quat}$ , aryl-*C*), 170.3 ( $C_{quat}$ ,  $CNO$ ), 171.4 ( $C_{quat}$ ,  $C=O$ ). – MS (EI, 70 eV),  $m/z$  (%): 333/332 (54/11)  $[M]^+$ , 304 (15), 273 (100), 245 (22), 140 (18), 119 (19). –  $C_{18}H_{24}N_2O_4$  (332.4): calcd. C 65.04, H 7.28, N 8.43; found C 65.32, H 7.47, N 8.33.

**trans-Methyl 4-Methoxycarbonylmethyl-7-(4-methoxy-phenyl)-5-oxo-6-phenyl-4,7-diazaspiro[2.5]-octane-8-carboxylate (2cj-Ph):** The crude product from **3c** (643 mg, 3.24 mmol), *p*-anisidine (468 mg, 3.80 mmol) and triethylamine (1.39 mL, 10.0 mmol) was purified by chromatography on 44 g of silica gel (3 × 24 cm;  $CH_2Cl_2$ /EtOAc 10 : 1;  $R_f$  = 0.42; MOPS) to yield 932 mg (68%) of **2cj-Ph** as a colorless solid, m.p. 133–136 °C. IR (KBr):  $\nu(\tilde{)} = 3002, 2953, 2835, 2362, 2337, 1740$  ( $C=O$ ), 1670 ( $C=O$ ), 1513, 1371, 1252, 1207, 1036, 813, 774, 699, 668  $cm^{-1}$ . –  $^1H$  NMR (250 MHz,  $CDCl_3$ ):  $\delta$  = 0.71–1.42 (m, Cpr-*H*, 4 H), 3.46 (s,  $CH$ , 1 H), 3.66 (s,  $CO_2CH_3$ , 3 H), 3.69 (s,  $CO_2CH_3$ , 3 H), 3.76 (s,  $OCH_3$ , 3 H), 3.77 (s,  $CH$ , 1 H), 3.88 (d,  $CH$ ,  $^3J = 17.8$  Hz, 1 H, A-part of an AB-system), 4.11 (d,  $CH$ ,  $^3J = 17.8$  Hz, 1 H, B-part of an AB-system), 6.46 (d, aryl-*H*, 2 H,  $^3J = 9$  Hz), 6.75 (d, aryl-*H*, 2 H,  $^3J = 9$  Hz), 7.25–7.37 (m, aryl-*H*, 3 H), 7.59–7.62 (d, aryl-*H*, 2 H). –  $^{13}C$  NMR (62.9 MHz,  $CDCl_3$ ):  $\delta$  = 9.6 (–, Cpr-*C*), 14.4 (–, Cpr-*C*), 40.7 ( $C_{quat}$ , Cpr-*C*), 43.9 (–,  $CH_2CO_2CH_3$ ), 52.2 (+,  $CH$ ), 52.5 (+,  $CH$ ), 55.5 (+,  $OCH_3$ ), 64.9 (+,  $CO_2CH_3$ ), 65.4 (+,  $CO_2CH_3$ ), 113.3 (+, aryl-*C*, 2 C), 114.8 (+, aryl-*C*, 2 C), 126.7 (+, aryl-*C*, 2 C), 127.3 (+, aryl-*C*), 128.5 (+, aryl-*C*, 2 C), 137.7 ( $C_{quat}$ , aryl-*C*), 140.3 ( $C_{quat}$ , aryl-*C*), 153.4 ( $C_{quat}$ , aryl-*C*), 169.0 ( $C_{quat}$ ,  $NC=O$ ), 170.0 ( $C_{quat}$ ,  $CO_2CH_3$ ), 172.1 ( $C_{quat}$ ,  $CO_2CH_3$ ). – MS (70eV);  $m/z$  (%): 438 (90)  $[M]^+$ , 410 (12), 379 (100), 351 (25), 211 (20).  $C_{24}H_{26}N_2O_6$  (438.5): calcd. C 62.38, H 5.24, N 6.41; found C 65.66, H 6.15, N 6.27.

**Methyl 4-(4-Chlorobenzyl)-5-oxo-7-p-tolyl-4,7-diazaspiro-[2.5]octane-8-carboxylate (2dk):** The crude product from **3d** (1.00 g, 2.44 mmol), 4-methylaniline (288 mg, 2.69 mmol) and triethylamine (764 mg, 5.91 mmol) was purified by chromatography on 50 g of silica gel (3 × 20 cm, MOPS, cyclohexane/MTBE 1 : 2 → 1 : 1;  $R_f$  = 0.23) to yield 706 mg (73%) of **2dk** as a colorless solid, m.p. 149 °C. – IR (KBr):  $\nu(\tilde{)} = 3433, 3269, 3027, 2973, 1675$



(C=O), 1641 (C=O), 1444, 1422, 1326, 1040, 755, 699, 612  $\text{cm}^{-1}$ . –  $^1\text{H}$  NMR ( $\text{CDCl}_3$ , 250 MHz):  $\delta$  = 0.77-0.95 (m, 2 H, Cpr-*H*), 1.19-1.33 (m, 1 H, Cpr-*H*), 1.36-1.43 (m, 1 H, Cpr-*H*), 2.26 (s, 3 H, ArCH<sub>3</sub>), 3.48 (s, 1 H, CH), 3.56 (s, 3 H, OCH<sub>3</sub>), 4.18 (d,  $^3J$  = 7.83 Hz, 1 H, A-part of an AB-system, PhCH<sub>2</sub>), 4.33 (s, 2 H, CH<sub>2</sub>), 4.71 (d,  $^3J$  = 7.83 Hz, 1 H, B-part of an AB-system, PhCH<sub>2</sub>), 6.52 (d,  $^3J$  = 4.15 Hz, 2 H, aryl-*H*), 7.08 (d,  $^3J$  = 4.15 Hz, 2 H, aryl-*H*), 7.15 (d,  $^3J$  = 4.10 Hz, 2 H, aryl-*H*), 7.28 (d,  $^3J$  = 4.10 Hz, 2 H, aryl-*H*). –  $^{13}\text{C}$  NMR ( $\text{CDCl}_3$ , 62.9 MHz):  $\delta$  = 9.7 (–, Cpr-*C*), 12.9 (–, Cpr-*C*), 20.2 (+, CH<sub>3</sub>), 41.5 (C<sub>quat</sub>, Cpr-*C*), 45.0 (–, CH<sub>2</sub>), 50.3 (–, PhCH<sub>2</sub>), 52.3 (+, OCH<sub>3</sub>), 64.5 (+, CHN), 111.7 (+, 2 C, aryl-*C*), 127.8 (C<sub>quat</sub>, aryl-*C*), 128.66 (+, 2 C, aryl-*C*), 128.69 (+, 2 C, aryl-*C*), 130.0 (+, 2 C, aryl-*C*), 133.1 (C<sub>quat</sub>, aryl-*C*), 136.1 (C<sub>quat</sub>, aryl-*C*), 144.5 (C<sub>quat</sub>, aryl-*C*), 169.5 (C<sub>quat</sub>, CN=O), 171.4 (C<sub>quat</sub>, C=O). – MS (70eV); *m/z* (%): 398/400 (76/23) [ $\text{M}^+$ ], 339/341 (100/32), 311/313 (24/8), 232 (48), 119 (48). – C<sub>22</sub>H<sub>23</sub>ClN<sub>2</sub>O<sub>3</sub> (398.9): calcd. C 66.24, H 5.81, N 7.02; found C 66.12, H 5.66, N 6.89.

**Methyl 4-(4-Chlorobenzyl)-5-oxo-7-(2-trifluoromethylbenzyl)-4,7-diazaspiro[2.5]octane-8-carboxylate (2dl):** The crude product from **3d** (1.05 g, 2.57 mmol), 2-(trifluoromethyl)benzylamine (497 mg, 2.83 mmol) and triethylamine (779 mg, 7.70 mmol) was purified by chromatography on 50 g of silica gel (3 × 20 cm, MOPS, pentane/Et<sub>2</sub>O 1 : 1 → 0 : 1; *R<sub>f</sub>* = 0.20) to yield 1.04 g (87%) of **2dl** as a colorless solid, m.p. 178–180 °C. – IR (film):  $\nu$ (tilde) = 3449, 3335, 3090, 2999, 2947, 2882, 2843, 1737 (C=O), 1435, 1370, 1326, 1309, 1288, 1256, 1203, 1033, 1013, 945, 839, 731, 649, 578  $\text{cm}^{-1}$ . –  $^1\text{H}$  NMR ( $\text{CDCl}_3$ , 250 MHz):  $\delta$  = 0.67–0.74 (m, 1 H, Cpr-*H*), 0.77–0.95 (m, 2 H, Cpr-*H*), 1.14–1.24 (m, 1 H, Cpr-*H*), 2.68 (s, 1 H, NCH), 3.60 (s, 3 H, OCH<sub>3</sub>), 3.72 (d,  $^3J$  = 8.42 Hz, 1 H, A-part of an AB-system, PhCH<sub>2</sub>), 3.77 (d,  $^3J$  = 7.99 Hz, 1 H, B-part of an AB-system, PhCH<sub>2</sub>), 3.91 (s, 2 H, CH<sub>2</sub>), 3.94 (d,  $^3J$  = 8.42 Hz, 1 H, A-part of an AB-system, PhCH<sub>2</sub>), 4.96 (d,  $^3J$  = 7.99 Hz, 1 H, A-part of an AB-system, PhCH<sub>2</sub>), 7.10 (d,  $^3J$  = 4.15 Hz, 2 H, aryl-*H*), 7.26 (d,  $^3J$  = 4.15 Hz, 2 H, aryl-*H*), 7.51 (d,  $^3J$  = 4.21 Hz, 2 H, aryl-*H*), 8.19 (d,  $^3J$  = 4.21 Hz, 2 H, aryl-*H*). –  $^{13}\text{C}$  NMR ( $\text{CDCl}_3$ , 62.9 MHz):  $\delta$  = 9.5 (–, Cpr-*C*), 11.5 (–, Cpr-*C*), 41.4 (C<sub>quat</sub>, Cpr-*C*), 43.3 (–, PhCH<sub>2</sub>), 51.7 (+, OCH<sub>3</sub>), 53.4 (–, PhCH<sub>2</sub>), 55.0 (–, CH<sub>2</sub>), 66.6 (+, CHN), 123.8 (+, 2 C, aryl-*C*), 128.2 (+, 2 C, aryl-*C*), 128.6 (+, 2 C, aryl-*C*), 129.2 (+, 2 C, aryl-*C*), 132.8 (C<sub>quat</sub>, aryl-*C*), 136.3 (C<sub>quat</sub>, aryl-*C*), 144.8 (C<sub>quat</sub>, aryl-*C*), 147.4 (C<sub>quat</sub>, aryl-*C*), 169.0 (C<sub>quat</sub>, CN=O), 170.4 (C<sub>quat</sub>, C=O). – MS (70eV); *m/z* (%): 466/468 (4/2) [ $\text{M}^+$ ], 407/409 (50/15), 300

(47), 159 (78), 125 (100) – HRMS (ESI): calcd. for  $C_{23}H_{23}ClF_3N_2O_3$  [ $M + H^+$ ] 467.1349; found 467.1344.

**Methyl 4-(4-Chlorobenzyl)-7-isobutyl-5-oxo-4,7-diaza-spiro[2.5]octane-8-carboxylate (2dm):** The crude product from **3d** (1.10 g, 2.68 mmol), isobutylamine (216 mg, 2.95 mmol) and triethylamine (814 mg, 8.04 mmol) was purified by chromatography on 50 g of silica gel ( $3 \times 20$  cm, MOPS, pentane/Et<sub>2</sub>O 1 : 1  $\rightarrow$  0 : 1;  $R_f = 0.69$ ) to yield 884 mg (90%) of **2dm** as a colorless solid, m.p. 63 °C. – IR (KBr):  $\nu(\text{tilde}) = 3311, 3094, 3009, 2952, 1739$  (C=O), 1669 (C=O), 1436, 1229, 1112, 1013, 946, 747  $\text{cm}^{-1}$ . – <sup>1</sup>H NMR (CDCl<sub>3</sub>, 250 MHz):  $\delta = 0.72\text{--}0.95$  (m, 9 H, cpr-*H*, CH<sub>3</sub>), 0.99–1.18 (m, 1 H, Cpr-*H*), 1.65–1.76 (m, 1 H, CH), 2.30–2.41 (m, 2 H, CH<sub>2</sub>), 2.71 (s, 1 H, NCH), 3.57 (s, 3 H, OCH<sub>3</sub>), 3.65–3.84 (m, 3 H, CH<sub>2</sub>), 4.93 (d,  $J = 16$  Hz, 1 H, CH<sub>2</sub>), 7.08 (d,  $^3J = 8.4$  Hz, 2 H, aryl-*H*), 7.22 (d,  $^3J = 8.4$  Hz, 2 H, aryl-*H*). – <sup>13</sup>C NMR (CDCl<sub>3</sub>, 62.9 MHz):  $\delta = 9.0$  (–, Cpr-C), 11.6 (–, Cpr-C), 20.2 (+, CH<sub>3</sub>), 20.3 (+, CH<sub>3</sub>), 25.7 (+, CH), 41.2 (C<sub>quat</sub>, Cpr-C), 43.3 (–, NCH<sub>2</sub>), 51.3 (+, OCH<sub>3</sub>), 53.7 (–, PhCH<sub>2</sub>), 63.2 (–, CH<sub>2</sub>), 67.5 (+, CHN), 128.2 (+, 2 C, aryl-C), 128.5 (+, 2 C, aryl-C), 132.7 (C<sub>quat</sub>, aryl-C), 136.6 (C<sub>quat</sub>, aryl-C), 169.8 (C<sub>quat</sub>, CN=O), 171.1 (C<sub>quat</sub>, C=O). MS (70eV):  $m/z$  (%): 364/366 (5/2) [ $M^+$ ], 305/307 (100/34), 198 (40), 125/127 (48/18). – C<sub>19</sub>H<sub>25</sub>ClN<sub>2</sub>O<sub>3</sub> (364.9): calcd. C 62.55, H 6.91, N 7.68; found C 62.65, H 6.98, N 7.89.

**Methyl 4-(4-Chlorobenzyl)-7-methoxycarbonylmethyl-5-oxo-4,7-diazaspiro[2.5]octane-8-carboxylate (2dd):** The crude product obtained **3d** (3.00 g, 7.33 mmol) in MeOH (50 mL), glycine methyl ester hydrochloride (1.01 g, 8.07 mmol) and triethylamine (3.60 mL, 25.7 mmol) with heating under reflux at 85 °C for 48 h, was purified by chromatography on 50 g of silica gel ( $3 \times 20$  cm, MOPS, Et<sub>2</sub>O;  $R_f = 0.26$ ) to yield 1.79 g (64%) of **2dd** as a colorless solid, m.p. 109 °C. – IR (KBr):  $\nu(\text{tilde}) = 3466, 3005, 2953, 1743$  (C=O), 1436, 1337, 1272, 1203, 1176, 1018, 936, 875, 833, 777, 667, 554  $\text{cm}^{-1}$ . – <sup>1</sup>H NMR (CDCl<sub>3</sub>, 250 MHz):  $\delta = 0.76\text{--}0.85$  (m, 1 H, Cpr-*H*), 0.93–1.10 (m, 2 H, Cpr-*H*), 1.18–1.26 (m, 1 H, Cpr-*H*), 3.08 (s, 1 H, CH), 3.48 (d,  $^3J = 8.9$  Hz, 1 H, A-part of an AB-system, CH<sub>2</sub>), 3.58 (s, 3 H, OCH<sub>3</sub>), 3.63 (d,  $^3J = 8.9$  Hz, 1 H, B-part of an AB-system, CH<sub>2</sub>), 3.70 (s, 3 H, OCH<sub>3</sub>), 3.76 (d,  $^3J = 7.7$  Hz, 1 H, A-part of an AB-system, CH<sub>2</sub>), 4.02 (d,  $^3J = 7.7$  Hz, 1 H, B-part of an AB-system, CH<sub>2</sub>), 4.08 (d,  $^3J = 7.95$  Hz, 1 H, A-part of an AB-system, PhCH<sub>2</sub>), 4.73 (d,  $^3J = 7.95$  Hz, 1 H, B-part of an AB-system, PhCH<sub>2</sub>), 7.10 (d,  $^3J = 4.2$  Hz, 2 H, aryl-*H*), 7.24

(d,  $^3J = 4.2$  Hz, 2 H, aryl-*H*). –  $^{13}\text{C}$  NMR ( $\text{CDCl}_3$ , 62.9 MHz):  $\delta = 9.3$  (–, Cpr-*C*), 13.4 (–, Cpr-*C*), 41.3 ( $\text{C}_{\text{quat}}$ , Cpr-*C*), 44.6 (–,  $\text{PhCH}_2$ ), 51.7 (+,  $\text{OCH}_3$ ), 51.9 (+,  $\text{OCH}_3$ ), 53.8 (–,  $\text{CH}_2$ ), 54.3 (–,  $\text{CH}_2$ ), 66.2 (+,  $\text{CHN}$ ), 126.4 (+, 2 *C*, aryl-*C*), 128.6 (+, 2 *C*, aryl-*C*), 132.8 ( $\text{C}_{\text{ipso}}$ , aryl-*C*), 136.5 ( $\text{C}_{\text{quat}}$ , aryl-*C*), 170.2 ( $\text{C}_{\text{quat}}$ ,  $\text{CN}=\text{O}$ ), 170.6 ( $\text{C}_{\text{quat}}$ ,  $\text{C}=\text{O}$ ), 171.1 ( $\text{C}_{\text{quat}}$ ,  $\text{C}=\text{O}$ ). – MS (70eV):  $m/z$  (%): 380.2/382.2 (32/11) [ $\text{M}^+$ ], 321.4/323.4 (100/30), 293.2/295.2 (36/12), 236.1/238.1 (50/15), 214.2 (100), 125.0/127.0 (84/26). – HRMS (ESI): calcd. for  $\text{C}_{18}\text{H}_{22}\text{ClN}_2\text{O}_5$  [ $\text{M} + \text{H}^+$ ] 381.1217; found 381.1212

**Methyl 4-(4-Chlorobenzyl)-7-(methoxycarbonylphenyl-methyl)-5-oxo-4,7-diazaspiro[2.5]-octane-8-carboxylate (2dn):** The crude product obtained from **3d** (3.00 g, 7.33 mmol) in MeOH (50 mL), (*S*)-phenylglycine methyl ester hydrochloride (1.63 g, 8.07 mmol) and triethylamine (2.60 g, 25.7 mmol) under reflux at 80 °C for 19 h, was purified by chromatography on 50 g of silica gel (3 × 20 cm, MOPS, pentane/ $\text{Et}_2\text{O}$  1 : 10 → 1 : 1) to yield 2.30 g (70%) of **2dn** as a colorless solid (1:1 mixture of diastereomers, which were separated by column chromatography on silica gel). – *Diastereomer 1*: 1.15 g (35%) of a colorless solid, m.p. 124–126 °C,  $R_f = 0.76$  ( $\text{Et}_2\text{O}$ ) – IR (KBr):  $\nu(\text{tilde}) = 3396, 3197, 3078, 2947, 1670$  ( $\text{C}=\text{O}$ ), 1467, 1458, 1420, 1340, 1329, 756  $\text{cm}^{-1}$ . –  $^1\text{H}$  NMR ( $\text{CDCl}_3$ , 250 MHz):  $\delta = 0.65$ –1.01 (m, 3 H, Cpr-*H*), 1.15–1.24 (m, 1 H, Cpr-*H*), 3.11 (s, 1 H, CH), 3.62 (s, 3 H,  $\text{OCH}_3$ ), 3.56–3.69 (m, 2 H,  $\text{CH}_2$ ), 3.65 (s, 3 H,  $\text{OCH}_3$ ), 3.93 (d,  $^3J = 7.96$  Hz, 1 H, A-part of an AB-system), 4.63 (s, 1 H, CH), 4.77 (d,  $^3J = 7.96$  Hz, 1 H, B-part of an AB-system), 7.07–7.42 (m, 9 H, aryl-*H*). –  $^{13}\text{C}$  NMR ( $\text{CDCl}_3$ , 62.9 MHz):  $\delta = 9.55$  (–, Cpr-*C*), 12.3 (–, Cpr-*C*), 41.5 ( $\text{C}_{\text{quat}}$ , Cpr-*C*), 44.1 (–,  $\text{CH}_2$ ), 50.9 (+, CH), 51.8 (+, CH), 52.1 (–,  $\text{CH}_2$ ), 65.0 (+,  $\text{OCH}_3$ ), 68.8 (+,  $\text{OCH}_3$ ), 128.3 (+, 2 *C*, aryl-*C*), 128.6 (+, aryl-*C*), 128.7 (+, 2 *C*, aryl-*C*), 128.8 (+, 2 *C*, aryl-*C*), 129.0 (+, 2 *C*, aryl-*C*), 132.8 ( $\text{C}_{\text{quat}}$ ,  $\text{C}_{\text{ipso}}$ ), 134.7 ( $\text{C}_{\text{quat}}$ ,  $\text{C}_{\text{ipso}}$ ), 136.5 ( $\text{C}_{\text{quat}}$ ,  $\text{C}_{\text{ipso}}$ ), 169.8 ( $\text{C}_{\text{quat}}$ ,  $\text{C}_{\text{ipso}}$ ), 171.0 ( $\text{C}_{\text{quat}}$ ,  $\text{C}=\text{O}$ ), 171.4 ( $\text{C}_{\text{quat}}$ ,  $\text{C}=\text{O}$ ). – MS (EI, 70 eV),  $m/z$  (%): 456/459 (8/2) [ $\text{M}^+$ ], 428 (12), 397 (90), 369 (21), 290 (71), 236 (34), 149 (58), 125 (100), 121 (79), 91 (40). –  $\text{C}_{24}\text{H}_{25}\text{ClN}_2\text{O}_5$  (456.93): calcd. C 63.09, H 5.51, N 6.13; found C 63.21, H 5.50, N 6.25. – *Diastereomer 2*: 1.15 g (35%) of a colorless solid, m.p. 127–128,  $R_f = 0.58$  ( $\text{Et}_2\text{O}$ ). – IR (KBr):  $\nu(\text{tilde}) = 3396, 3197, 3078, 2947, 1670$  ( $\text{C}=\text{O}$ ), 1467, 1458, 1420, 1340, 1329, 756  $\text{cm}^{-1}$ . –  $^1\text{H}$  NMR ( $\text{CDCl}_3$ , 250 MHz):  $\delta = 0.79$ –0.84 (m, 3 H, Cpr-*H*), 1.09–1.13 (m, 1 H, Cpr-*H*), 2.68 (s, 1 H, CH), 3.41 (s, 3 H,  $\text{OCH}_3$ ), 3.69 (s, 3 H,  $\text{OCH}_3$ ), 3.91 (d,  $^3J = 8.00$  Hz, 1 H), 3.92 (d,  $^3J = 8.00$  Hz, 1 H, A-part of an AB-system), 4.61

(s, 1 H, CH), 4.06 (d,  $^3J = 8.00$  Hz, 1 H, B-part of an AB-system), 7.07–7.36 (m, 9 H, aryl-H). –  $^{13}\text{C}$  NMR ( $\text{CDCl}_3$ , 62.9 MHz):  $\delta = 9.59$  (–, Cpr-C), 12.4 (–, Cpr-C), 41.7 ( $\text{C}_{\text{quat}}$ , Cpr-C), 44.1 (–,  $\text{CH}_2$ ), 51.5 (+, CH), 52.3 (+, CH), 52.7 (–,  $\text{CH}_2$ ), 63.3 (+,  $\text{OCH}_3$ ), 69.5 (+,  $\text{OCH}_3$ ), 128.3 (+, 2 C, aryl-C), 128.6 (+, aryl-C), 128.8 (+, 2 C, aryl-C), 128.9 (+, 2 C, aryl-C), 129.0 (+, 2 C, aryl-C), 132.8 ( $\text{C}_{\text{quat}}$ ,  $\text{C}_{\text{ipso}}$ ), 134.5 ( $\text{C}_{\text{quat}}$ ,  $\text{C}_{\text{ipso}}$ ), 136.5 ( $\text{C}_{\text{quat}}$ ,  $\text{C}_{\text{ipso}}$ ), 169.5 ( $\text{C}_{\text{quat}}$ ,  $\text{C}_{\text{ipso}}$ ), 170.9 ( $\text{C}_{\text{quat}}$ , C=O), 171.1 ( $\text{C}_{\text{quat}}$ , C=O). – MS (EI, 70 eV),  $m/z$  (%): 456/459 (8/2)  $[\text{M}]^+$ , 428 (12), 397 (90), 369 (21), 290 (71), 236 (34), 149 (58), 125 (100), 121 (79), 91 (40). –  $\text{C}_{24}\text{H}_{25}\text{ClN}_2\text{O}_5$  (456.9): calcd. C 63.09, H 5.51, N 6.13; found C 63.29, H 5.59, N 6.39.

**Methyl 4-(4-Chlorobenzyl)-7-(1-methoxycarbonyl-2-methylpropyl)-5-oxo-4,7-diazaspiro-[2.5]octane-8-carboxylate (2do):** The crude product obtained from **3d** (3.00 g, 7.33 mmol) in MeOH (50 mL), (*S*)-valine methyl ester hydrochloride (1.35 g, 8.07 mmol) and triethylamine (4.00 mL, 29.3 mmol) under reflux at 85 °C for 24 h, was purified by chromatography on 50 g of silica gel (3 × 20 cm, MOPS, pentane/Et<sub>2</sub>O 3 : 1 → 0 : 1,  $R_f = 0.23$  [pentane/Et<sub>2</sub>O = 1 : 1]) to yield 2.23 g (70%) of **2do** as a colorless solid (1:1 mixture of diastereomers, which were separated by column chromatography on silica gel). – *Diastereomer 1*: IR (KBr):  $\nu(\text{tilde}) = 3327, 3026, 2950, 2857, 1734$  (C=O), 1706 (C=O), 1652 (C=O), 1456, 1419, 1272, 1207, 1143, 1029, 735, 701  $\text{cm}^{-1}$ . –  $^1\text{H}$  NMR ( $\text{CDCl}_3$ , 250 MHz):  $\delta = 0.69$ – $0.79$  (m, 3 H, Cpr-H), 0.85 (t,  $^3J = 6.65$  Hz, 3 H,  $\text{CH}_3$ ), 0.97 (t,  $^3J = 6.65$  Hz, 3 H,  $\text{CH}_3$ ), 1.10–1.24 (m, 1 H, Cpr-H), 2.00–2.05 (m, 1 H, CH), 2.80–2.87 (m, 2 H,  $\text{CH}_2$ ), 3.58 (s, 3 H,  $\text{OCH}_3$ ), 3.68 (s, 3 H,  $\text{OCH}_3$ ), 3.73 (d,  $^3J = 7.91$  Hz, 1 H, CH), 4.00 (d,  $^3J = 5.32$  Hz, 1 H, A-part of an AB-system), 4.10 (d,  $^3J = 5.32$  Hz, 1 H, B-part of an AB-system), 4.65 (d,  $^3J = 7.91$  Hz, 1 H, CH), 7.07 (d,  $^3J = 4.11$  Hz, 2 H, aryl-H), 7.23 (d,  $^3J = 4.11$  Hz, 2 H, aryl-H). –  $^{13}\text{C}$  NMR ( $\text{CDCl}_3$ , 62.9 MHz):  $\delta = 9.55$  (–, Cpr-C), 12.3 (–, Cpr-C), 41.5 ( $\text{C}_{\text{quat}}$ , Cpr-C), 44.1 (–,  $\text{CH}_2$ ), 50.9 (+, CH), 51.8 (+, CH), 52.1 (–,  $\text{CH}_2$ ), 65.0 (+,  $\text{OCH}_3$ ), 68.8 (+,  $\text{OCH}_3$ ), 128.3 (+, 2 C, aryl-C), 128.6 (+, aryl-C), 128.7 (+, 2 C, aryl-C), 128.8 (+, 2 C, aryl-C), 129.0 (+, 2 C, aryl-C), 132.8 ( $\text{C}_{\text{quat}}$ ,  $\text{C}_{\text{ipso}}$ ), 134.7 ( $\text{C}_{\text{quat}}$ ,  $\text{C}_{\text{ipso}}$ ), 136.5 ( $\text{C}_{\text{quat}}$ ,  $\text{C}_{\text{ipso}}$ ), 169.8 ( $\text{C}_{\text{quat}}$ ,  $\text{C}_{\text{ipso}}$ ), 171.0 ( $\text{C}_{\text{quat}}$ , C=O), 171.4 ( $\text{C}_{\text{quat}}$ , C=O). – MS (70eV):  $m/z$  (%): 422/424 (16/6)  $[\text{M}^+]$ , 394/396 (11/4), 363/365 (100/32), 335/337 (22/7), 256 (83), 125.0/127.0 (52/17). – M.p. 100–101 °C –  $\text{C}_{21}\text{H}_{27}\text{ClN}_2\text{O}_5$  (422.9): calcd. C 59.64, H 6.44, N 6.62; found C 59.34, H 6.23, N 6.55. – *Diastereomer 2*: IR (KBr):  $\nu(\text{tilde}) = 3333, 3023, 2930, 1730$  (C=O), 1700 (C=O), 1444, 1413, 1122, 701  $\text{cm}^{-1}$ . –  $^1\text{H}$  NMR ( $\text{CDCl}_3$ , 250 MHz):  $\delta = 0.66$ – $0.76$  (m, 3 H,

Cpr-H), 0.86 (t,  $^3J = 6.65$  Hz, 3 H, CH<sub>3</sub>), 0.92 (t,  $^3J = 6.65$  Hz, 3 H, CH<sub>3</sub>), 1.12–1.26 (m, 1 H, Cpr-H), 2.02–2.05 (m, 1 H, CH), 2.82–2.90 (m, 2 H, CH<sub>2</sub>), 3.58 (s, 3 H, OCH<sub>3</sub>), 3.68 (s, 3 H, OCH<sub>3</sub>), 3.75 (d,  $^3J = 7.91$  Hz, 1 H, CH), 3.99 (d,  $^3J = 5.32$  Hz, 1 H, A-part of an AB-system), 4.12 (d,  $^3J = 5.32$  Hz, 1 H, B-part of an AB-system), 4.66 (d,  $^3J = 7.91$  Hz, 1 H, CH), 7.07 (d,  $^3J = 4.11$  Hz, 2 H, aryl-H), 7.23 (d,  $^3J = 4.11$  Hz, 2 H, aryl-H). – <sup>13</sup>C NMR (CDCl<sub>3</sub>, 62.9 MHz):  $\delta = 9.57$  (–, Cpr-C), 12.6 (–, Cpr-C), 41.5 (C<sub>quat</sub>, Cpr-C), 44.0 (–, CH<sub>2</sub>), 51.0 (+, CH), 51.9 (+, CH), 52.2 (–, CH<sub>2</sub>), 65.2 (+, OCH<sub>3</sub>), 68.8 (+, OCH<sub>3</sub>), 128.5 (+, 2 C, aryl-C), 128.6 (+, aryl-C), 128.7 (+, 2 C, aryl-C), 128.8 (+, 2 C, aryl-C), 128.9 (+, 2 C, aryl-C), 132.8 (C<sub>quat</sub>, C<sub>ipso</sub>), 134.7 (C<sub>quat</sub>, C<sub>ipso</sub>), 136.5 (C<sub>quat</sub>, C<sub>ipso</sub>), 170.0 (C<sub>quat</sub>, C<sub>ipso</sub>), 171.2 (C<sub>quat</sub>, C=O), 171.3 (C<sub>quat</sub>, C=O). – MS (70eV): *m/z* (%): 422/424 (16/6) [M<sup>+</sup>], 394/396 (11/4), 363/365 (100/32), 335/337 (22/7), 256 (83), 125.0/127.0 (52/17). – M.p. 98–99 °C – C<sub>21</sub>H<sub>27</sub>ClN<sub>2</sub>O<sub>5</sub> (422.9): calcd. C 59.64, H 6.44, N 6.62; found C 59.45, H 6.37, N 6.46.

**Methyl 4-(4-Chlorobenzyl)-7-(methoxyphenylmethyl)-5-oxo-4,7-diazaspiro[2.5]octane-8-carboxylate (6dq):** The crude product obtained from **3d** (1.12 g, 2.73 mmol) in MeOH (20 mL), (*S*)- $\alpha$ -phenylglycinol (412 mg, 3.00 mmol) and triethylamine (1.50 mL, 10.9 mmol) at 20 °C in 24 h, was purified by chromatography on 50 g of silica gel (3 × 20 cm, MOPS, Et<sub>2</sub>O; *R<sub>f</sub>* = 0.30) to yield 657 mg (65%) of **6dq** as a colorless oil (1:1 mixture of diastereomers, which were separated by column chromatography on silica gel). – *Diastereomer 1*: IR (KBr):  $\nu(\text{tilde}) = 3319, 3213, 3090, 3068, 2961, 2928, 1682$  (C=O), 1495, 1462, 1443, 1325, 1229, 1092, 1016, 819, 813, 804, 735, 604, 553, 433 cm<sup>-1</sup>. – <sup>1</sup>H NMR (CDCl<sub>3</sub>, 250 MHz):  $\delta = 0.26$ –0.35 (m, 1 H, Cpr-H), 0.55–0.64 (m, 1 H, Cpr-H), 0.95–1.04 (m, 1 H, Cpr-H), 1.12–1.23 (m, 1 H, Cpr-H), 2.38–2.61 (br s, 1 H, OH), 3.08 (s, 1 H, CH), 3.54 (s, 3 H, OCH<sub>3</sub>), 3.68–3.81 (m, 4 H, 2×CH, CH<sub>2</sub>), 3.83–3.91 (m, 1 H, CH), 3.92 (d,  $^3J = 7.90$  Hz, 1 H, A-part of an AB-system), 4.68 (d,  $^3J = 7.90$  Hz, 1 H, B-part of an AB-system), 7.06 (d,  $^3J = 4.16$  Hz, 2 H, aryl-H), 7.22–7.41 (m, 7 H, aryl-H). – <sup>13</sup>C NMR (CDCl<sub>3</sub>, 62.9 MHz):  $\delta = 9.67$  (–, Cpr-C), 12.6 (–, Cpr-C), 42.6 (C<sub>quat</sub>, Cpr-C), 44.3 (–, CH<sub>2</sub>), 52.0 (+, OCH<sub>3</sub>), 53.1 (–, CH<sub>2</sub>), 62.8 (–, CH<sub>2</sub>), 63.7 (+, CH), 67.9 (+, CH), 128.1 (+, 2 C, aryl-C), 128.3 (+, aryl-C), 128.4 (+, 2 C, aryl-C), 128.6 (+, 2 C, aryl-C), 128.8 (+, 2 C, aryl-C), 128.9 (+, 2 C, aryl-C), 132.9 (C<sub>quat</sub>, C<sub>ipso</sub>), 136.4 (C<sub>quat</sub>, C<sub>ipso</sub>), 136.8 (C<sub>quat</sub>, C<sub>ipso</sub>), 170.5 (C<sub>quat</sub>, C=O), 172.4 (C<sub>quat</sub>, C=O). – MS (EI, 70 eV), *m/z* (%): 397 (100) [M]<sup>+</sup>, 369 (19), 236 (15), 125 (50). – C<sub>22</sub>H<sub>21</sub>ClN<sub>2</sub>O<sub>3</sub> (396.9): calcd. C 66.58, H 5.33, N 7.06; found C 66.72, H 5.55, N

7.16. – *Diastereomer 2*: IR (KBr):  $\nu(\tilde{)} = 3304, 3055, 2950, 1736$  (C=O), 1659 (C=O), 1457, 1436, 1419, 1341, 1213, 745  $\text{cm}^{-1}$ . –  $^1\text{H}$  NMR ( $\text{CDCl}_3$ , 250 MHz):  $\delta = 0.44\text{--}0.48$  (m, 1 H, Cpr-H), 0.63–0.67 (m, 1 H, Cpr-H), 0.86–0.93 (m, 1 H, Cpr-H), 1.12–1.25 (m, 1 H, Cpr-H), 2.76 (s, 1 H, OH), 3.08 (s, 1 H, CH), 3.52 (s, 3 H, OCH<sub>3</sub>), 3.69–4.02 (m, 6 H, 2×CH, 2×CH<sub>2</sub>), 4.72 (d,  $^3J = 7.85$  Hz, 1 H, B-part of an AB-system), 7.05 (d,  $^3J = 4.13$  Hz, 2 H, aryl-H), 7.21–7.36 (m, 7 H, aryl-H). –  $^{13}\text{C}$  NMR ( $\text{CDCl}_3$ , 62.9 MHz):  $\delta = 9.53$  (–, Cpr-C), 13.3 (–, Cpr-C), 41.3 (C<sub>quat</sub>, Cpr-C), 44.4 (–, CH<sub>2</sub>), 50.0 (+, CH), 52.0 (+, OCH<sub>3</sub>), 62.0 (–, CH<sub>2</sub>), 65.6 (–, CH<sub>2</sub>), 67.8 (+, CH), 128.45 (+, 2 C, aryl-C), 128.52 (+, 3 C, aryl-C), 128.6 (+, 2 C, aryl-C), 128.9 (+, 2 C, aryl-C), 132.9 (C<sub>quat</sub>, C<sub>ipso</sub>), 136.3 (C<sub>quat</sub>, C<sub>ipso</sub>), 136.6 (C<sub>quat</sub>, C<sub>ipso</sub>), 170.4 (C<sub>quat</sub>, C=O), 171.6 (C<sub>quat</sub>, C=O). – MS (EI, 70 eV),  $m/z$  (%): 399/397 (32/100) [ $\text{M}]^+$ , 369 (21), 249 (16), 236 (24), 139 (19), 125 (100), 105 (100), 77 (62). – C<sub>22</sub>H<sub>21</sub>ClN<sub>2</sub>O<sub>3</sub> (396.9): calcd. C 66.58, H 5.33, N 7.06; found C 66.73, H 5.55, N 7.26.

**Methyl 4-(4-Chlorobenzyl)-5-oxo-7-(4-nitrobenzyl)-4,7-diazaspiro[2.5]octane-8-carboxylate (2dr)**: The crude product from **3d** (1.06 g, 2.60 mmol), 4-nitrobenzylamine (499 mg, 2.86 mmol) and triethylamine (788 mg, 7.79 mmol) was purified by chromatography on 50 g of silica gel (3 × 20 cm, MOPS, pentane/CHCl<sub>3</sub> 1 : 1 → 0 : 1;  $R_f = 0.62$ ) to yield 963 mg (84%) of **2dr** as a colorless solid, m.p. 126 °C. – IR (KBr):  $\nu(\tilde{)} = 3146, 3073, 2954, 2931, 2905, 1732$  (C=O), 1687 (C=O), 1617 (C=O), 1492, 1435, 1432, 1351, 1330, 1263, 1243, 1219, 1204, 1162, 1129, 1016, 976, 853, 839, 765, 703, 668, 569  $\text{cm}^{-1}$ . –  $^1\text{H}$  NMR ( $\text{CDCl}_3$ , 250 MHz):  $\delta = 0.67\text{--}0.74$  (m, 1 H, Cpr-H), 0.77–0.95 (m, 2 H, Cpr-H), 1.14–1.24 (m, 1 H, Cpr-H), 2.68 (s, 1 H, NCH), 3.60 (s, 3 H, OCH<sub>3</sub>), 3.72 (d,  $^3J = 8.42$  Hz, 1 H, A-part of an AB-system, PhCH<sub>2</sub>), 3.77 (d,  $^3J = 7.99$  Hz, 1 H, A-part of an AB-system, PhCH<sub>2</sub>), 3.91 (s, 2 H, CH<sub>2</sub>), 3.94 (d,  $^3J = 8.42$  Hz, 1 H, B-part of an AB-system, PhCH<sub>2</sub>), 4.96 (d,  $^3J = 7.99$  Hz, 1 H, B-part of an AB-system, PhCH<sub>2</sub>), 7.10 (d,  $^3J = 4.15$  Hz, 2 H, aryl-H), 7.26 (d,  $^3J = 4.15$  Hz, 2 H, aryl-H), 7.51 (d,  $^3J = 4.21$  Hz, 2 H, aryl-H), 8.19 (d,  $^3J = 4.21$  Hz, 2 H, aryl-H). –  $^{13}\text{C}$  NMR ( $\text{CDCl}_3$ , 62.9 MHz):  $\delta = 9.5$  (–, Cpr-C), 11.6 (–, Cpr-C), 41.3 (C<sub>quat</sub>, Cpr-C), 43.3 (–, PhCH<sub>2</sub>), 51.7 (+, OCH<sub>3</sub>), 53.4 (–, PhCH<sub>2</sub>), 58.0 (–, CH<sub>2</sub>), 66.3 (+, CHN), 123.8 (+, 2 C, aryl-C), 128.2 (+, 2 C, aryl-C), 128.6 (+, 2 C, aryl-C), 129.2 (+, 2 C, aryl-C), 132.8 (C<sub>quat</sub>, aryl-C), 136.3 (C<sub>quat</sub>, aryl-C), 144.8 (C<sub>quat</sub>, aryl-C), 147.4 (C<sub>quat</sub>, aryl-C), 169.0 (C<sub>quat</sub>, CN=O), 170.4 (C<sub>quat</sub>, C=O). MS (EI, 70 eV),  $m/z$  (%): 78 (14), 89 (20), 125/127 (94/26), 136 (23), 138 (13), 236 (36), 251 (13), 277 (100), 290 (16), 356 (24), 384

(79), 415 (14), 443/445 (14/5)  $[M]^+$  –  $C_{22}H_{24}ClN_3O_5$  (445.9): calcd. C 59.26, H 5.43, N 9.42; found C 59.45, H 5.66, N 9.73.

**Methyl 4-(4-Chlorobenzyl)-7-naphthalene-2-ylmethyl-5-oxo-4,7-diazaspiro[2.5]octane-8-carboxylate (2ds):** The crude product from **3d** (1.16 g, 2.84 mmol), 2-naphthylmethylamine (490 mg, 3.12 mmol) and triethylamine (861 mg, 8.51 mmol) was purified by chromatography on 50 g of silica gel (3 × 20 cm, MOPS, pentane/Et<sub>2</sub>O 1 : 1 → 0 : 1;  $R_f$  = 0.62) to yield 1.08 g (85%) of **2ds** as a colorless foam. – IR (film):  $\nu(\text{tilde})$  = 3321, 3091, 2953, 2869, 1737 (C=O), 1666 (C=O), 1433, 1342, 1202, 1024, 971, 881, 789, 730  $\text{cm}^{-1}$ . – <sup>1</sup>H NMR (CDCl<sub>3</sub>, 250 MHz):  $\delta$  = 0.41–0.51 (m, 1 H, Cpr-*H*), 0.71–0.81 (m, 2 H, Cpr-*H*), 1.02–1.13 (m, 1 H, Cpr-*H*), 2.61 (s, 1 H, NCH), 3.58 (s, 3 H, OCH<sub>3</sub>), 3.67 (d, <sup>3</sup>*J* = 8.01 Hz, 1 H, A-part of an AB-system, NCH), 3.84 (d, <sup>3</sup>*J* = 8.00 Hz, 1 H, A-part of an AB-system, PhCH<sub>2</sub>), 4.10 (d, <sup>3</sup>*J* = 8.56 Hz, 1 H, B-part of an AB-system, PhCH<sub>2</sub>), 4.17 (d, <sup>3</sup>*J* = 6.37 Hz, 1 H, A-part of an AB-system, PhCH<sub>2</sub>), 4.30 (d, <sup>3</sup>*J* = 6.37 Hz, 1 H, B-part of an AB-system, PhCH<sub>2</sub>), 4.98 (d, <sup>3</sup>*J* = 8.01 Hz, 1 H, B-part of an AB-system, NCH), 7.09 (d, <sup>3</sup>*J* = 3.94 Hz, 2 H, aryl-*H*), 7.25 (d, <sup>3</sup>*J* = 4.17 Hz, 2 H, aryl-*H*), 7.37–7.42 (m, 2 H, aryl-*H*), 7.46–7.55 (m, 2 H, aryl-*H*), 7.78–7.87 (m, 2 H, aryl-*H*), 8.21–8.24 (m, 1 H, aryl-*H*). – <sup>13</sup>C NMR (CDCl<sub>3</sub>, 62.9 MHz):  $\delta$  = 9.5 (–, Cpr-C), 11.2 (–, Cpr-C), 41.5 (C<sub>quat</sub>, Cpr-C), 43.1 (–, PhCH<sub>2</sub>), 51.4 (+, OCH<sub>3</sub>), 53.7 (–, PhCH<sub>2</sub>), 57.0 (–, CH<sub>2</sub>), 65.3 (+, CHN), 124.5 (+, aryl-C), 125.1 (+, aryl-C), 125.86 (+, aryl-C), 125.90 (+, aryl-C), 127.8 (+, aryl-C), 128.2 (+, 2 C, aryl-C), 128.4 (+, 2 C, aryl-C), 128.5 (+, aryl-C), 128.7 (+, aryl-C), 132.1 (C<sub>quat</sub>, aryl-C), 132.2 (C<sub>quat</sub>, aryl-C), 132.7 (C<sub>quat</sub>, aryl-C), 133.8 (C<sub>quat</sub>, aryl-C), 136.5 (C<sub>quat</sub>, aryl-C), 169.5 (C<sub>quat</sub>, CN=O), 170.9 (C<sub>quat</sub>, C=O). – MS (EI, 70 eV), *m/z* (%): 448 (6)  $[M]^+$ , 420 (3), 389 (24), 282 (9), 141 (100), 125 (17), 115 (9). – HRMS (ESI): calcd. for C<sub>26</sub>H<sub>25</sub>ClN<sub>2</sub>O<sub>3</sub>  $[M + H]^+$  449.1632; found 449.1626.

**Methyl 4-(4-Chlorobenzyl)-7-(3,4-dimethylphenyl)-5-oxo-4,7-diazaspiro[2.5]octane-8-carboxylate (2dt):** The crude product from **3d** (1.00 g, 2.44 mmol), 3,4-dimethylaniline (326 mg, 2.69 mmol) and triethylamine (544 mg, 5.34 mmol) was purified by chromatography on 50 g of silica gel (3 × 20 cm, MOPS, cyclohexane/MTBE 1 : 2 → 1 : 1;  $R_f$  = 0.26) to yield 730 g (72%) of **2dt** as a colorless solid, m.p. 166–168 °C. – IR (KBr):  $\nu(\text{tilde})$  = 3269, 3139, 3091, 3071, 3004, 2974, 2956, 2931, 2835, 1677 (C=O), 1649 (C=O),

1514, 1459, 1417, 1325, 1246, 1176, 1055, 1033, 732, 553  $\text{cm}^{-1}$ . –  $^1\text{H}$  NMR ( $\text{CDCl}_3$ , 250 MHz):  $\delta$  = 0.80–0.89 (m, 2 H, Cpr-*H*), 1.19–1.40 (m, 2 H, Cpr-*H*), 2.17 (s, 3 H,  $\text{CH}_3$ ), 2.23 (s, 3 H,  $\text{CH}_3$ ), 3.49 (s, 1 H, *CH*), 3.56 (s, 3 H,  $\text{OCH}_3$ ), 4.18 (d,  $^3J$  = 7.8 Hz, 1 H, A-part of an AB-system,  $\text{PhCH}_2$ ), 4.33 (s, 2 H,  $\text{CH}_2$ ), 4.70 (d,  $^3J$  = 7.8 Hz, 1 H, B-part of an AB-system,  $\text{PhCH}_2$ ), 6.36 (d,  $^3J$  = 4.1 Hz, 1 H, aryl-*H*), 6.43 (s, 1 H, aryl-*H*), 7.02 (d,  $^3J$  = 4.1 Hz, 1 H, aryl-*H*), 7.14 (d,  $^3J$  = 4.1 Hz, 2 H, aryl-*H*), 7.28 (d,  $^3J$  = 4.25 Hz, 2 H, aryl-*H*). –  $^{13}\text{C}$  NMR ( $\text{CDCl}_3$ , 62.9 MHz):  $\delta$  = 10.6 (–, Cpr-*C*), 13.7 (–, Cpr-*C*), 19.4 (+, Toluy- $\text{CH}_3$ ), 21.2 (+, Toluy- $\text{CH}_3$ ), 42.4 ( $\text{C}_{\text{quat}}$ , Cpr-*C*), 45.9 (–,  $\text{CH}_2$ ), 51.2 (–,  $\text{PhCH}_2$ ), 53.1 (+,  $\text{OCH}_3$ ), 65.2 (+, *CHN*), 110.0 (+, aryl-*C*), 114.2 (+, aryl-*C*), 127.6 ( $\text{C}_{\text{quat}}$ , aryl-*C*), 129.5 (+, 2 C, aryl-*C*), 129.6 (+, 2 C, aryl-*C*), 131.4 ( $\text{C}_{\text{quat}}$ , aryl-*C*), 134.0 ( $\text{C}_{\text{quat}}$ , aryl-*C*), 137.0 ( $\text{C}_{\text{quat}}$ , aryl-*C*), 138.5 ( $\text{C}_{\text{quat}}$ , aryl-*C*), 145.8 ( $\text{C}_{\text{quat}}$ , aryl-*C*), 170.4 ( $\text{C}_{\text{quat}}$ ,  $\text{CN}=\text{O}$ ), 172.4 ( $\text{C}_{\text{quat}}$ ,  $\text{C}=\text{O}$ ). – MS (70eV); *m/z* (%): 412/414 (75/22) [ $\text{M}^+$ ], 351/353 (100/32), 325/327 (24/8), 246 (48), 125 (19).  $\text{C}_{23}\text{H}_{25}\text{ClN}_2\text{O}_3$  (412.9): calcd. C 66.90, H 6.10, N 6.78; found C 66.99, H 6.15, N 6.82.

**Methyl 4-(4-Chlorobenzyl)-5-oxo-7-(4-chlorophenyl)-4,7-diazaspiro[2.5]octane-8-carboxylate (2du):** The crude product from **3d** (1.00 g, 2.44 mmol), *p*-chloroaniline (288 mg, 2.69 mmol) and triethylamine (764 mg, 5.91 mmol) was purified by chromatography on 50 g of silica gel (3 × 20 cm, MOPS,  $\text{Et}_2\text{O}$ ;  $R_f$  = 32) to yield 399 mg (39%) of **2du** as a colorless solid, m.p. 165–166 °C – IR (KBr):  $\nu(\text{tilde})$  = 3443, 3323, 3052, 2951, 1739 ( $\text{C}=\text{O}$ ), 1670 ( $\text{C}=\text{O}$ ), 1492, 1435, 1404, 1337, 1221, 1093, 1015, 796, 736  $\text{cm}^{-1}$ . –  $^1\text{H}$  NMR ( $\text{CDCl}_3$ , 250 MHz):  $\delta$  = 0.75–0.82 (m, 1 H, Cpr-*H*), 0.85–0.91 (m, 1 H, Cpr-*H*), 1.21–1.27 (m, 1 H, Cpr-*H*), 1.35–1.43 (m, 1 H, Cpr-*H*), 2.26 (s, 3 H,  $\text{ArCH}_3$ ), 3.48 (s, 1 H, *CH*), 3.54 (s, 3 H,  $\text{OCH}_3$ ), 4.19 (d,  $^3J$  = 7.83 Hz, 1 H, A-part of an AB-system), 4.31 (dd,  $^2J$  = 9.93 Hz, 1 H, *CH*), 4.35 (dd, 1 H,  $^2J$  = 9.95 Hz), 4.70 (d,  $^3J$  = 7.83 Hz, 1 H, B-part of an AB-system), 6.50 (d,  $^3J$  = 4.49 Hz, 2 H, aryl-*H*), 6.97–7.33 (m, 6 H, aryl-*H*). –  $^{13}\text{C}$  NMR ( $\text{CDCl}_3$ , 62.9 MHz):  $\delta$  = 9.80 (–, Cpr-*C*), 12.9 (–, Cpr-*C*), 41.4 ( $\text{C}_{\text{quat}}$ , Cpr-*C*), 45.1 (–,  $\text{CH}_2$ ), 50.2 (–,  $\text{CH}_2\text{Ph}$ ), 52.4 (+,  $\text{OCH}_3$ ), 64.4 (+, *CHN*), 112.8 (+, 2 C, aryl-*C*), 123.5 ( $\text{C}_{\text{quat}}$ , aryl-*C*), 128.7 (+, 4 C, aryl-*C*), 129.3 (+, 2 C, aryl-*C*), 133.2 ( $\text{C}_{\text{quat}}$ ,  $\text{C}_{\text{ipso}}$ ), 135.9 ( $\text{C}_{\text{quat}}$ ,  $\text{C}_{\text{ipso}}$ ), 145.2 ( $\text{C}_{\text{quat}}$ ,  $\text{C}_{\text{ipso}}$ ), 169.0 ( $\text{C}_{\text{quat}}$ ,  $\text{CN}=\text{O}$ ), 170.9 ( $\text{C}_{\text{quat}}$ ,  $\text{C}=\text{O}$ ). – MS (70eV); *m/z* (%): 418/420 (36/23) [ $\text{M}^+$ ], 359/361 (47/32), 252/254 (62/18), 236/238 (46/16), 125/127 (100/38) –  $\text{C}_{21}\text{H}_{20}\text{N}_2\text{O}_3\text{Cl}_2$  (419.3). – HRMS (ESI): calcd. for  $\text{C}_{21}\text{H}_{21}\text{Cl}_2\text{N}_2\text{O}_3$  [ $\text{M} + \text{H}^+$ ] 419.0929; found 419.0924.



**Methyl 4-(4-Chlorobenzyl)-7-[2-(1*H*-indol-3-yl)-ethyl]-5-oxo-4,7-diazaspiro[2.5]octane-8-carboxylate (2dv):** The crude product obtained from **3d** (752 mg, 1.84 mmol), MeOH (20 mL), tryptamine (324 mg, 2.02 mmol), and triethylamine (1.02 mL, 7.35 mmol) at 40 °C within 3 d, was purified by chromatography on 50 g of silica gel (3 × 20 cm, CH<sub>2</sub>Cl<sub>2</sub>/MeOH 40 : 1, *R<sub>f</sub>* = 0.38) to yield 825 mg (99%) of **2dv** as a colorless solid, m.p. 135–136 °C. – IR (KBr):  $\nu(\text{tilde}) = 3454, 3088, 3000, 2947, 2876, 2844, 1739$  (C=O), 1437, 1420, 1363, 1273, 1197, 1163, 1032, 934, 876, 811, 714, 659, 577 cm<sup>-1</sup>. – <sup>1</sup>H NMR (CDCl<sub>3</sub>, 250 MHz):  $\delta = 0.73\text{--}0.93$  (m, 3 H, Cpr-H), 1.09–1.22 (m, 1 H, Cpr-H), 2.96 (s, 4 H, 2×CH<sub>2</sub>), 3.59 (s, 3 H, OCH<sub>3</sub>), 3.82 (d, <sup>2</sup>*J* = 7.93 Hz, 1 H), 3.93 (s, 2 H, CH<sub>2</sub>), 4.94 (d, <sup>2</sup>*J* = 7.93 Hz, 1 H), 5.29 (s, 1 H, CH), 7.03–7.36 (m, 8 H, aryl-H), 7.57 (d, <sup>3</sup>*J* = 3.82 Hz, 1 H, aryl-H), 8.14–8.25 (br s, 1 H, NH). – <sup>13</sup>C NMR (CDCl<sub>3</sub>, DEPT, 62.9 MHz):  $\delta = 9.0$  (–, Cpr-C), 11.9 (–, Cpr-C), 23.2 (–, CH<sub>2</sub>), 41.1 (C<sub>quat</sub>, Cpr-C), 43.5 (–, CH<sub>2</sub>), 51.6 (+, OCH<sub>3</sub>), 53.5 (–, CH<sub>2</sub>), 55.5 (–, CH<sub>2</sub>), 67.0 (+, CH), 111.1 (+, aryl-C), 113.2 (C<sub>quat</sub>, aryl-C), 118.5 (+, aryl-C), 119.1 (+, aryl-C), 121.7 (+, aryl-C), 121.8 (+, aryl-C), 127.2 (C<sub>quat</sub>, C<sub>ipso</sub>), 128.2 (+, 2 C, aryl-C), 128.5 (+, 2 C, aryl-C), 131.8 (C<sub>quat</sub>, C<sub>ipso</sub>), 132.7 (C<sub>quat</sub>, C<sub>ipso</sub>), 136.1 (C<sub>quat</sub>, C<sub>ipso</sub>), 136.4 (C<sub>quat</sub>, C<sub>ipso</sub>), 169.8 (C<sub>quat</sub>, C=O), 171.0 (C<sub>quat</sub>, C=O). MS (ESI); *m/z* (%): 474/476 (100/32) [M+Na<sup>+</sup>], 925/927 (47/17) [2M+Na<sup>+</sup>] – C<sub>25</sub>H<sub>26</sub>ClN<sub>3</sub>O<sub>3</sub> (451.96): calcd. C 66.44, H 5.80, N 9.30; found C 66.87, H 5.99, N 9.54.

**trans-Methyl 4-(4-Trifluoromethylbenzyl)-6-(4-phenyl)-5-oxo-7-(4-methoxyphenyl)-4,7-diazaspiro[2.5]octane-8-carboxylate (2ej-Ph).** The crude product obtained from **3e** (812 mg, 1.52 mmol) in THF (20 mL), *p*-anisidine (281 mg, 2.28 mmol) and triethylamine (1.50 mL, 10.9 mmol) under reflux for 12 h, was purified by chromatography on 30 g of silica gel (3 × 20 cm, pentane/Et<sub>2</sub>O 1 : 0 → 1 : 2, *R<sub>f</sub>* = 0.32, MOPS) and recrystallization from Et<sub>2</sub>O to yield 250 mg (62%) of **2ef-Ph** as a slightly yellow solid, m.p. 132–133 °C. – IR (KBr):  $\nu(\text{tilde}) = 3323, 2977, 2923, 1726$  (C=O), 1670 (C=O), 1454, 1407, 1369, 1347, 1233, 1154, 843, 748, 701 cm<sup>-1</sup>. – <sup>1</sup>H NMR (CDCl<sub>3</sub>, 250 MHz):  $\delta = 0.43\text{--}0.53$  (m, 2 H, Cpr-H), 0.92–1.01 (m, 2 H, Cpr-H), 3.50 (s, 3 H, OCH<sub>3</sub>), 3.70 (s, 3 H, OCH<sub>3</sub>), 3.72 (s, 1 H, CH), 4.27 (d, <sup>2</sup>*J* = 7.76 Hz, 1 H, A-part of an AB-system), 4.50 (d, <sup>2</sup>*J* = 7.76 Hz, 1 H, B-part of an AB-system), 5.64 (s, 1 H, CH), 6.44 (m, 2 H, aryl-H), 6.75 (m, 2 H, aryl-H), 7.07–7.15 (m, 4 H, aryl-H), 7.28–7.41 (m, 2 H, aryl-H), 7.65–7.69 (m, 3 H, aryl-H). – <sup>13</sup>C NMR (CDCl<sub>3</sub>,

Supplementary Material (ESI) for Organic & Biomolecular Chemistry  
This journal is (c) The Royal Society of Chemistry 2009

DEPT, 62.9 MHz):  $\delta$  = 9.75 (–, Cpr-C), 14.7 (–, Cpr-C), 40.8 (C<sub>quat</sub>, Cpr-C), 47.5 (–, CH<sub>2</sub>), 52.3 (+, OCH<sub>3</sub>), 55.5 (+, OCH<sub>3</sub>), 65.1 (+, CH), 65.7 (+, CH), 113.3 (+, 2 C, aryl-C), 114.9 (+, 2 C, aryl-C), 121.1 (+, 2 C, aryl-C), 126.8 (+, 2 C, aryl-C), 127.8 (+, aryl-C), 128.6 (+, 2 C, aryl-C), 128.8 (+, 2 C, aryl-C), 136.2 (C<sub>quat</sub>, C<sub>ipso</sub>), 137.9 (C<sub>quat</sub>, C<sub>ipso</sub>), 140.2 (C<sub>quat</sub>, C<sub>ipso</sub>), 148.3 (C<sub>quat</sub>, C<sub>ipso</sub>), 152.5 (C<sub>quat</sub>, C<sub>ipso</sub>), 170.4 (C<sub>quat</sub>, C=O), 172.0 (C<sub>quat</sub>, C=O). – MS (ESI), *m/z* (%): 547.2 (100) [M+Na]<sup>+</sup>, 1071.4.4 (20) [2M+Na]<sup>+</sup>. – C<sub>29</sub>H<sub>27</sub>F<sub>3</sub>N<sub>2</sub>O<sub>4</sub> (524.5): calcd. C 66.40, H 5.19, N 5.34; found C 66.22, H 5.14, N 5.25.

Methyl 4-(3-Benzyloxypropyl)-7-(2-bromacetyl)-5-oxo-4,7-diazaspiro[2.5]octane-8-carboxylate (**8**).

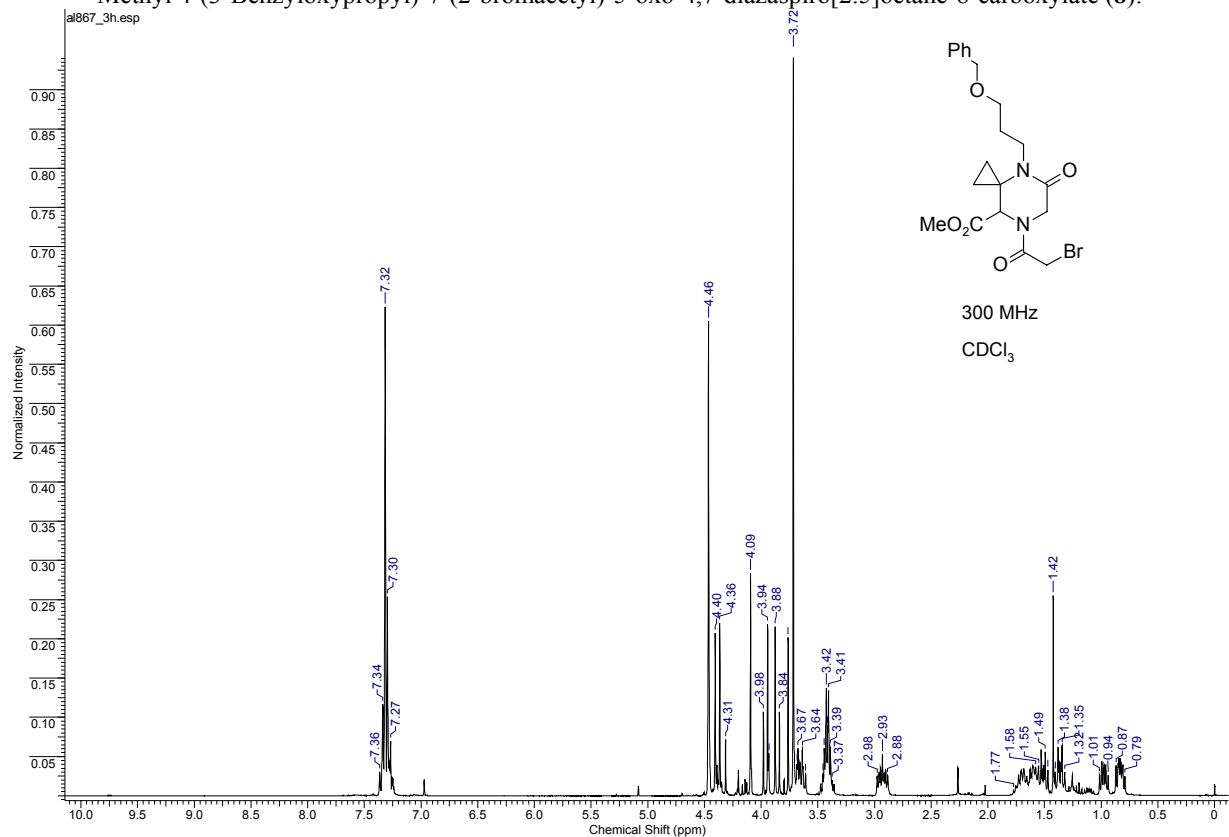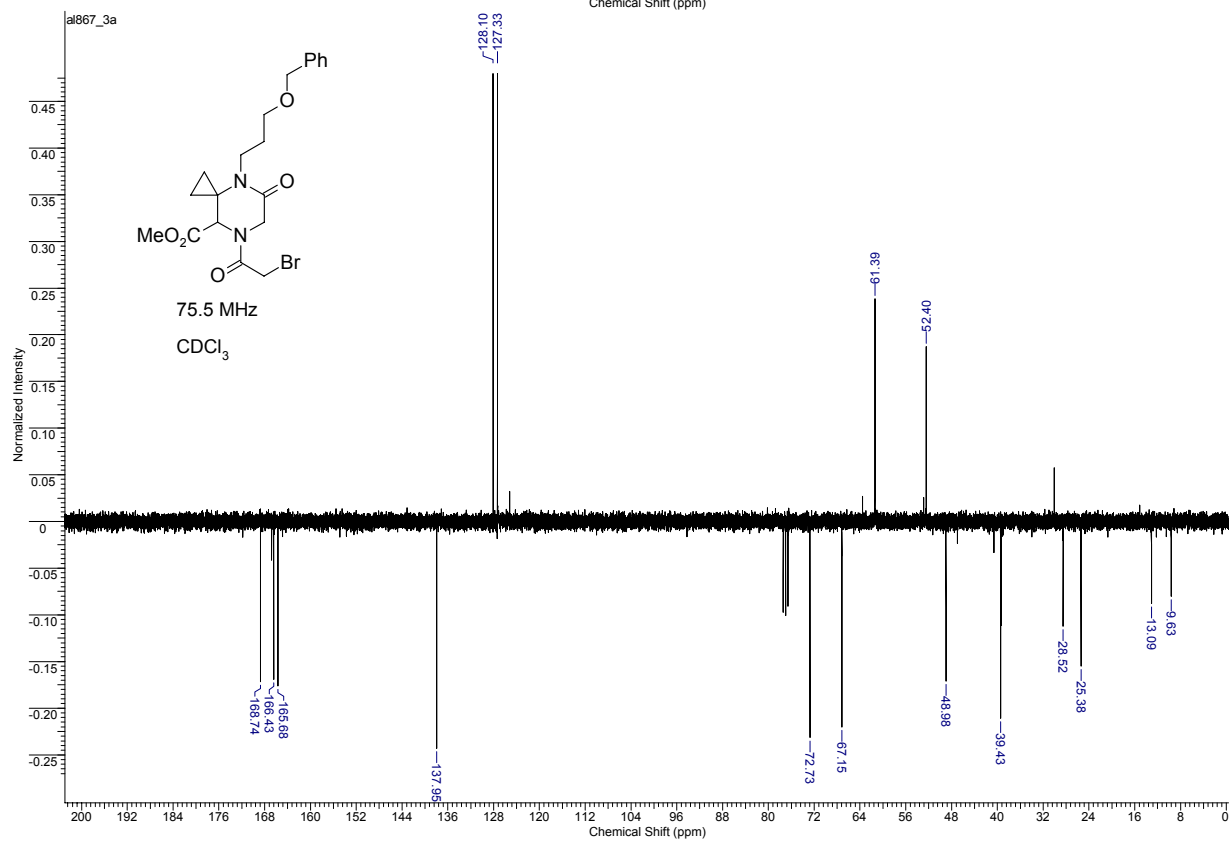

Methyl (2-(2-Bromo-2-phenylacetyl)-(methoxymethyl)-amino)cyclopropyl-2-chloroacetate (**3c**)

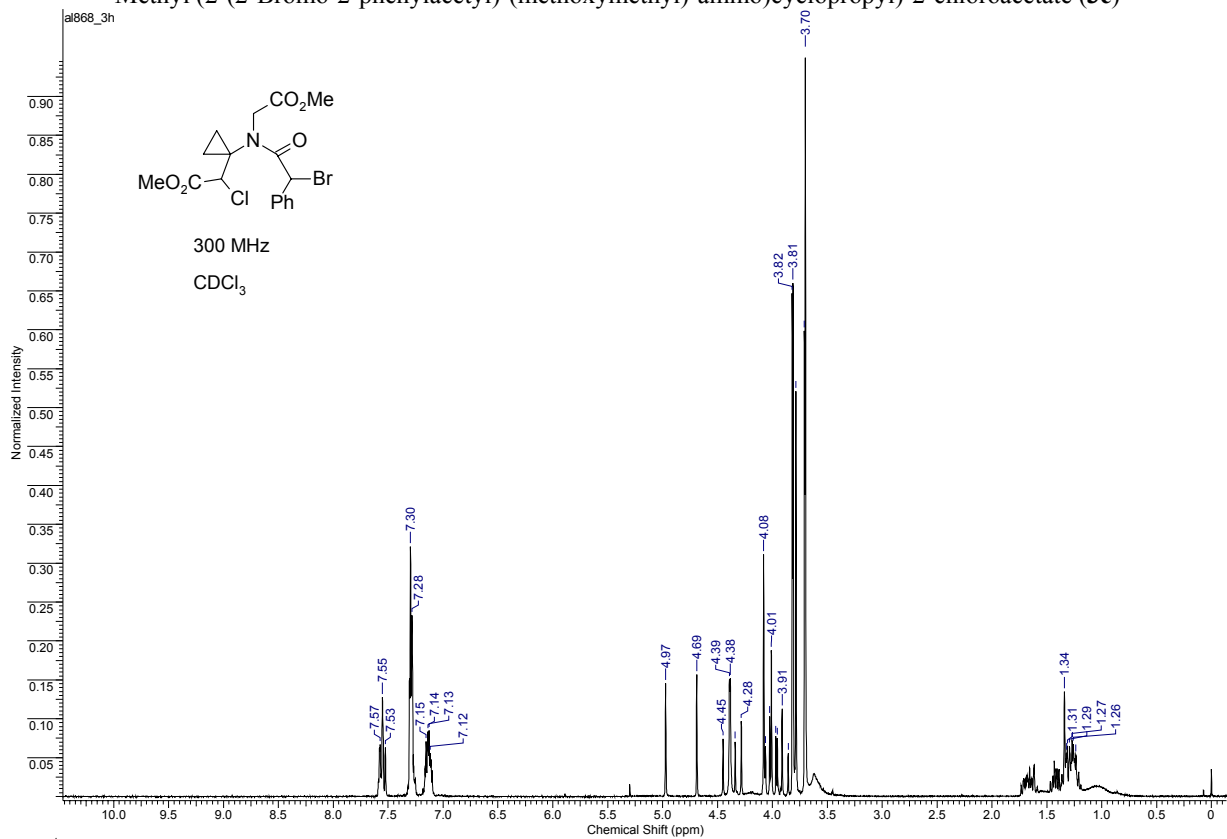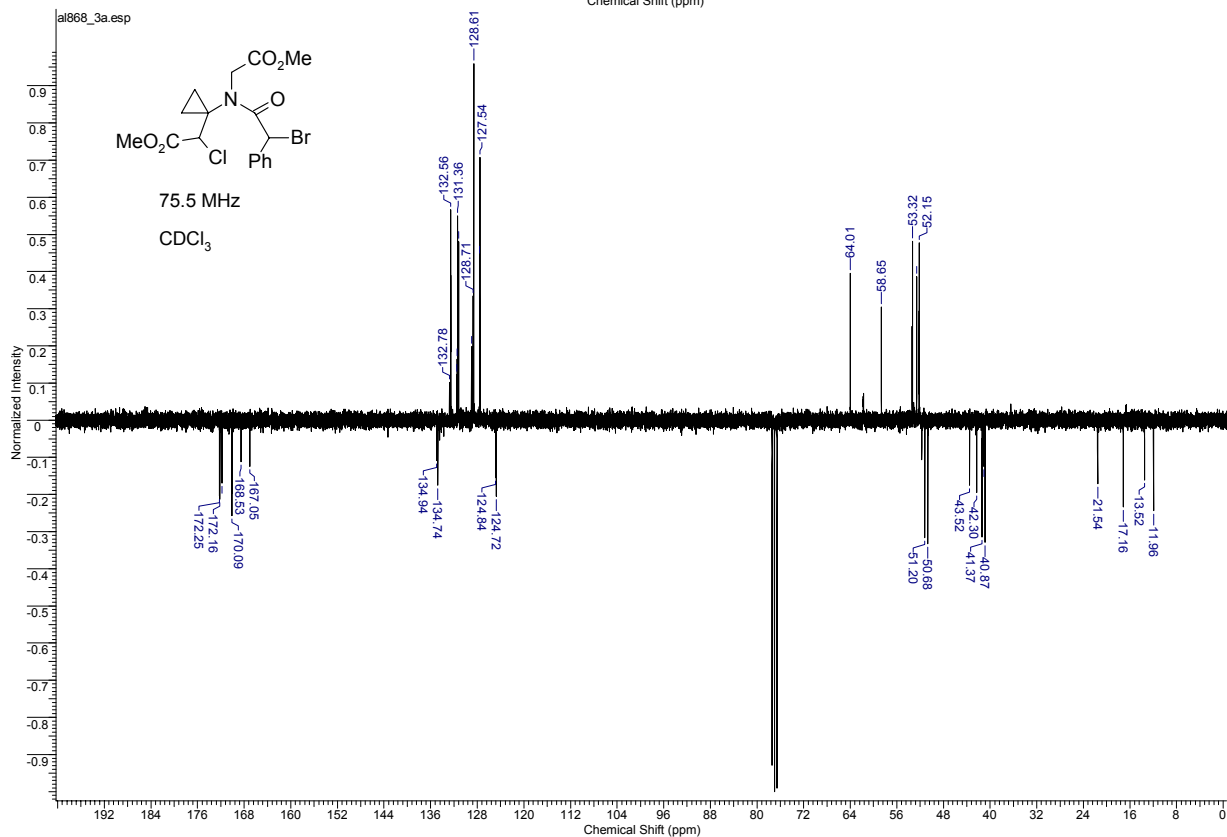

Methyl 2-(1-(*N*-(4-Chlorobenzyl)-2-bromoacetamido)-cyclopropyl)-2-chloroacetate (**3d**)

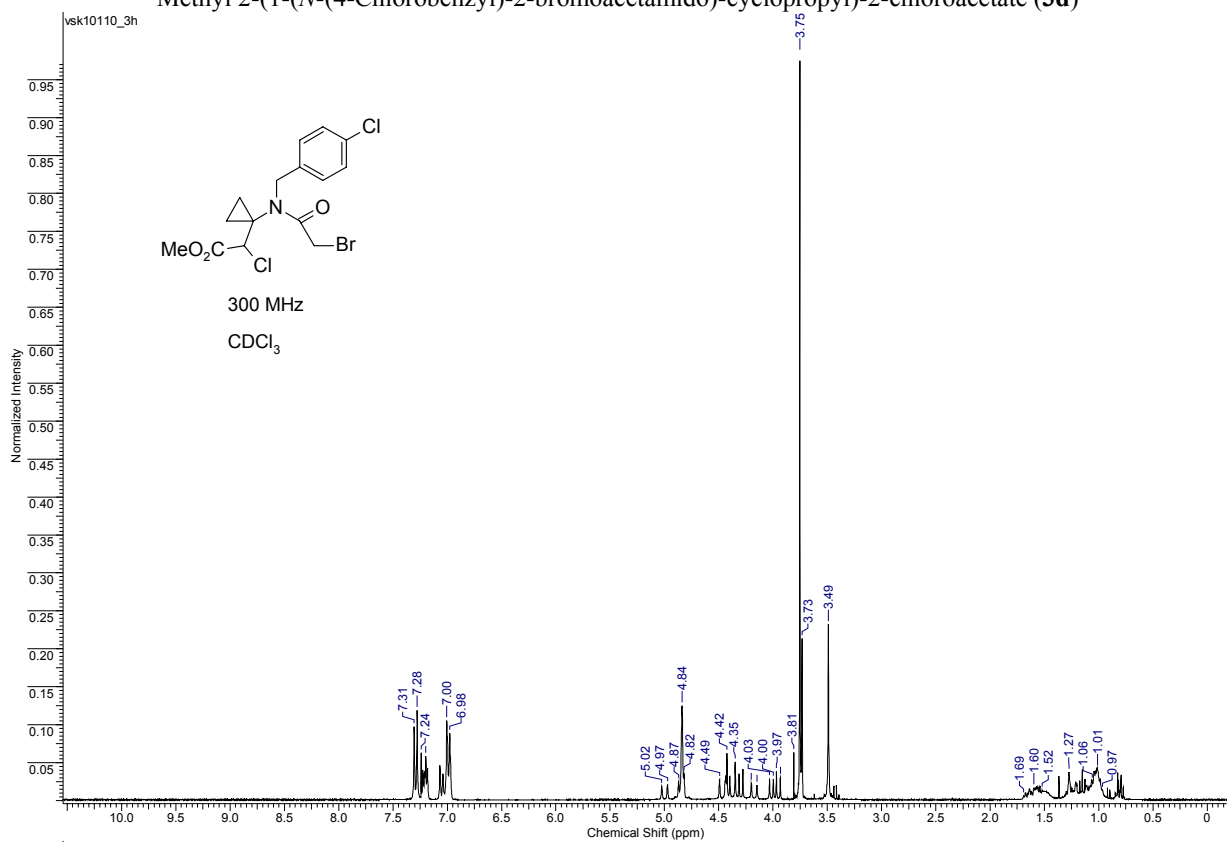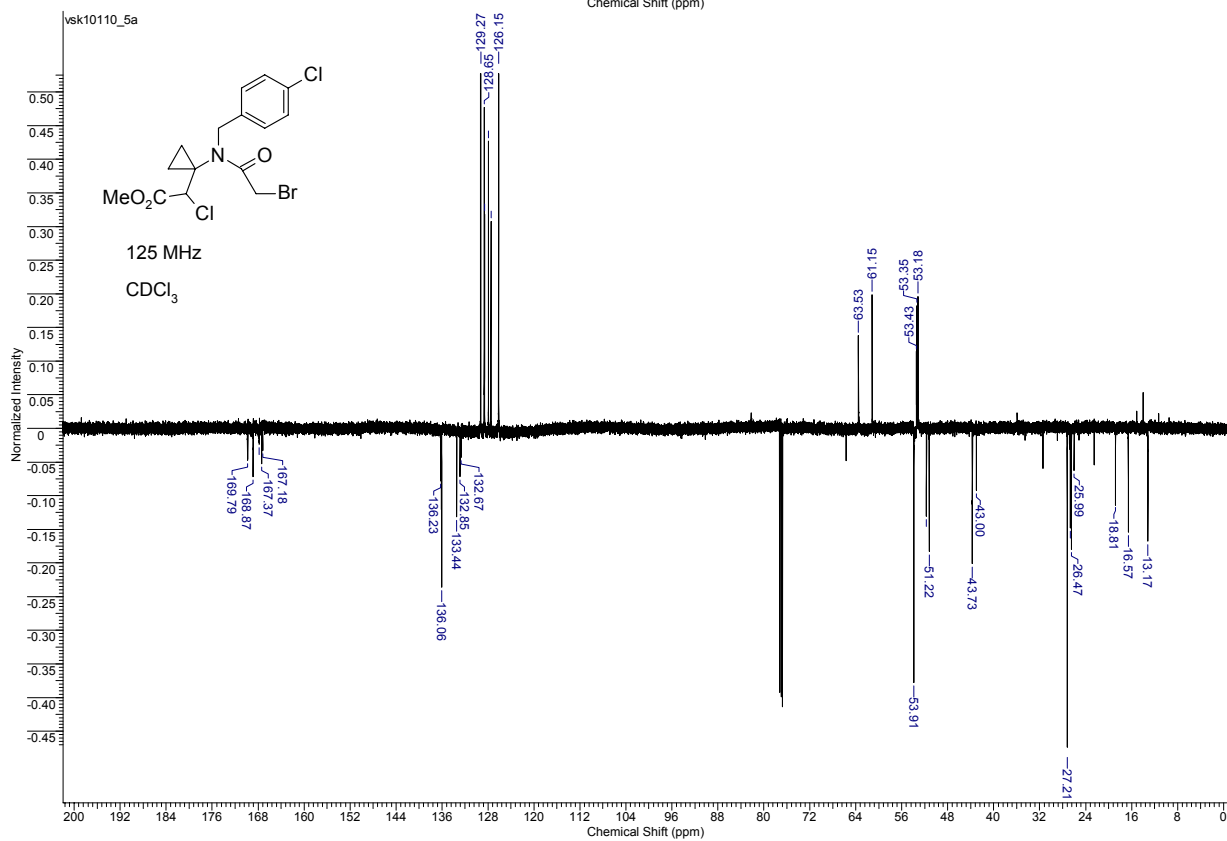

Methyl 4-(4-Chlorobenzyl)-5-oxo-7-(2-(trifluoromethyl)benzyl)-4,7-diazaspiro[2.5]octane-8-carboxylate (**2dl**)

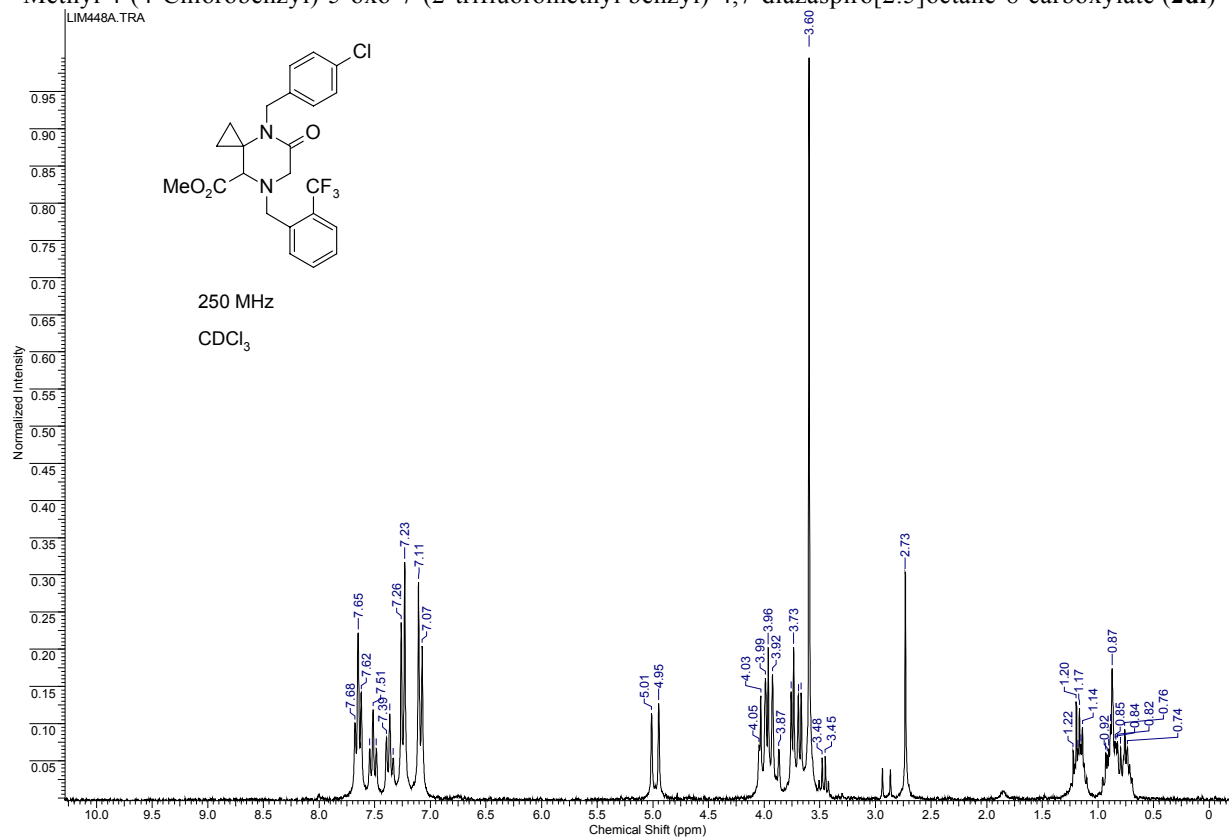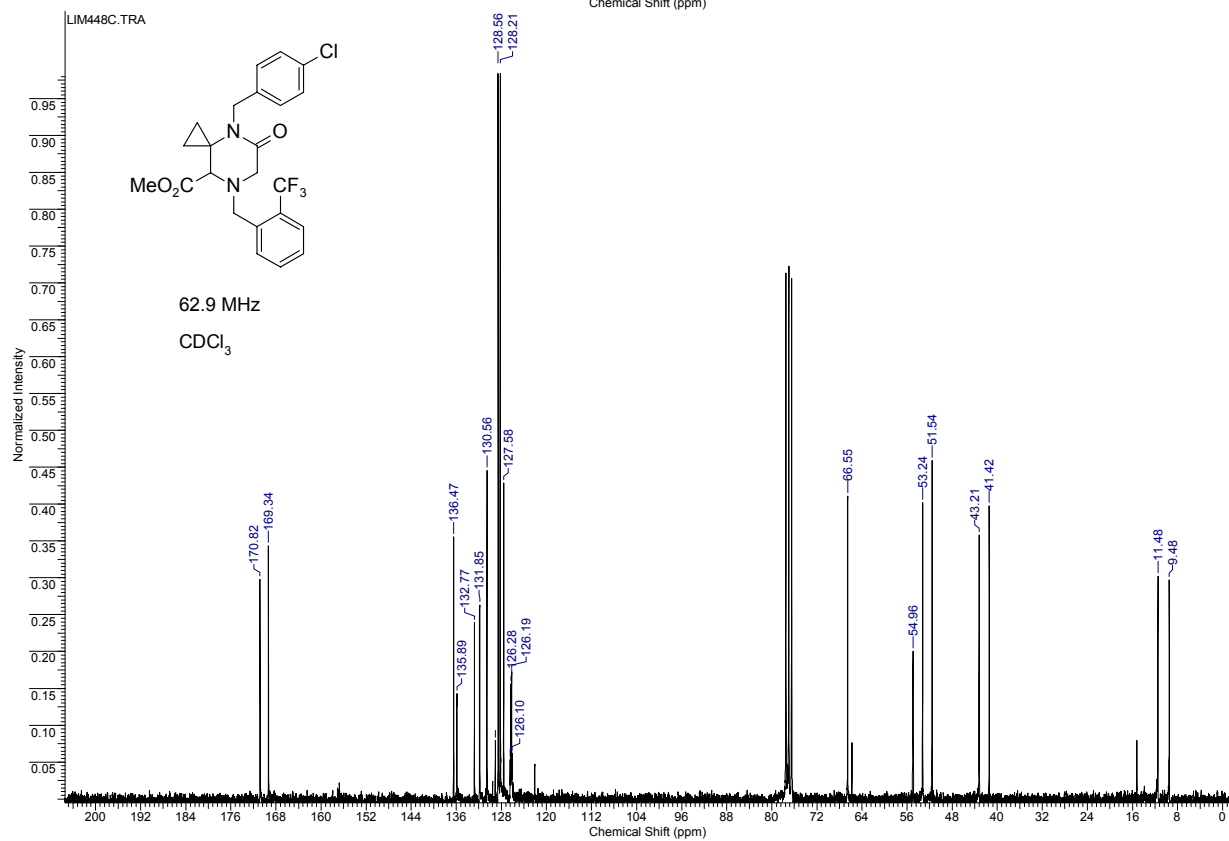

Supplementary Material (ESI) for Organic & Biomolecular Chemistry  
This journal is (c) The Royal Society of Chemistry 2009

Methyl 4-(4-Chlorobenzyl)-7-methoxycarbonylmethyl-5-oxo-4,7-diazaspiro[2.5]octane-8-carboxylate (**2dd**)

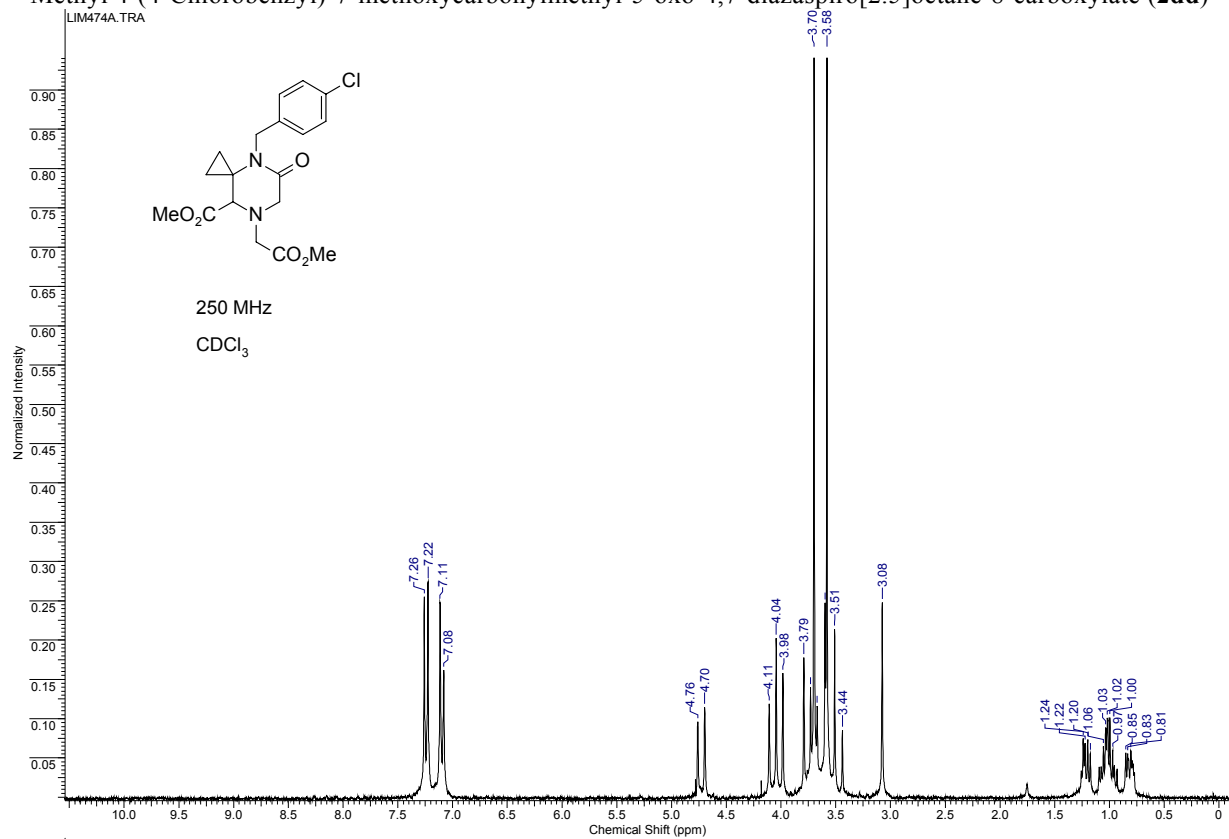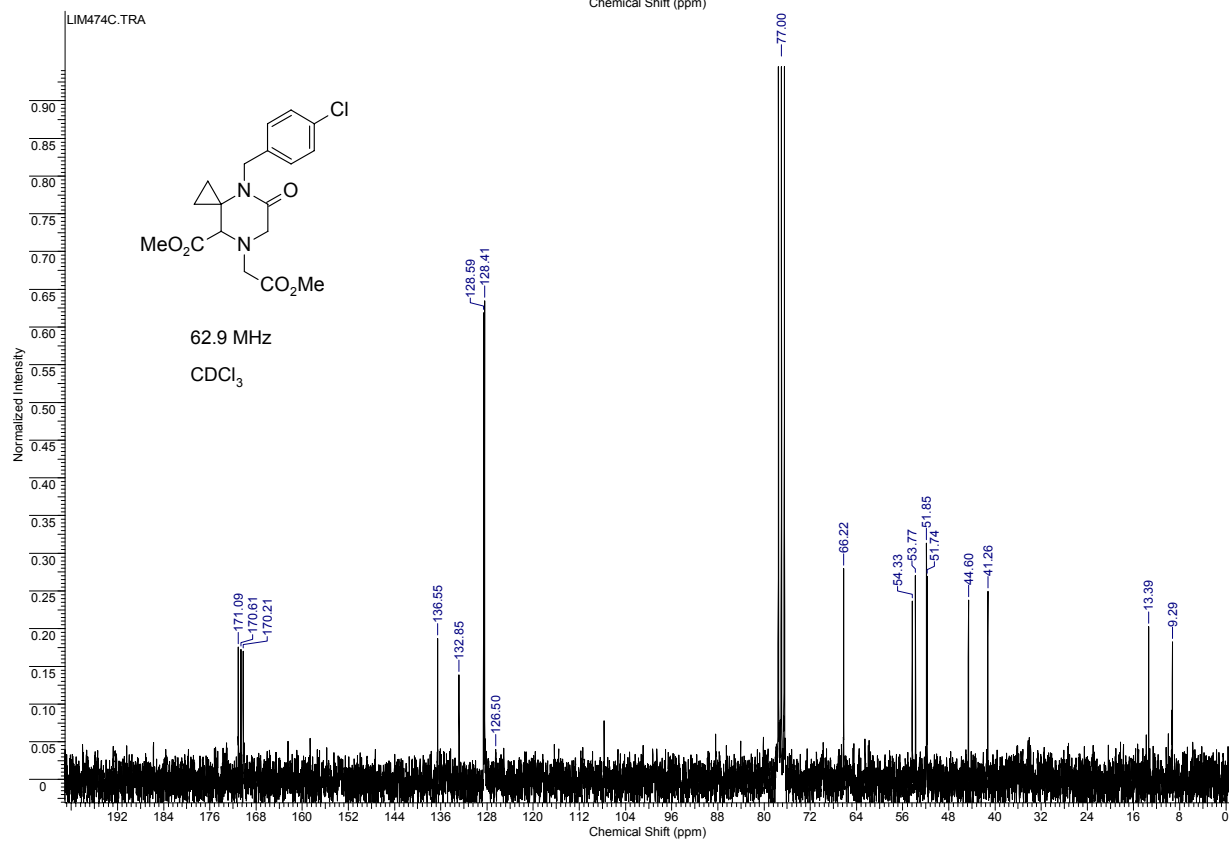

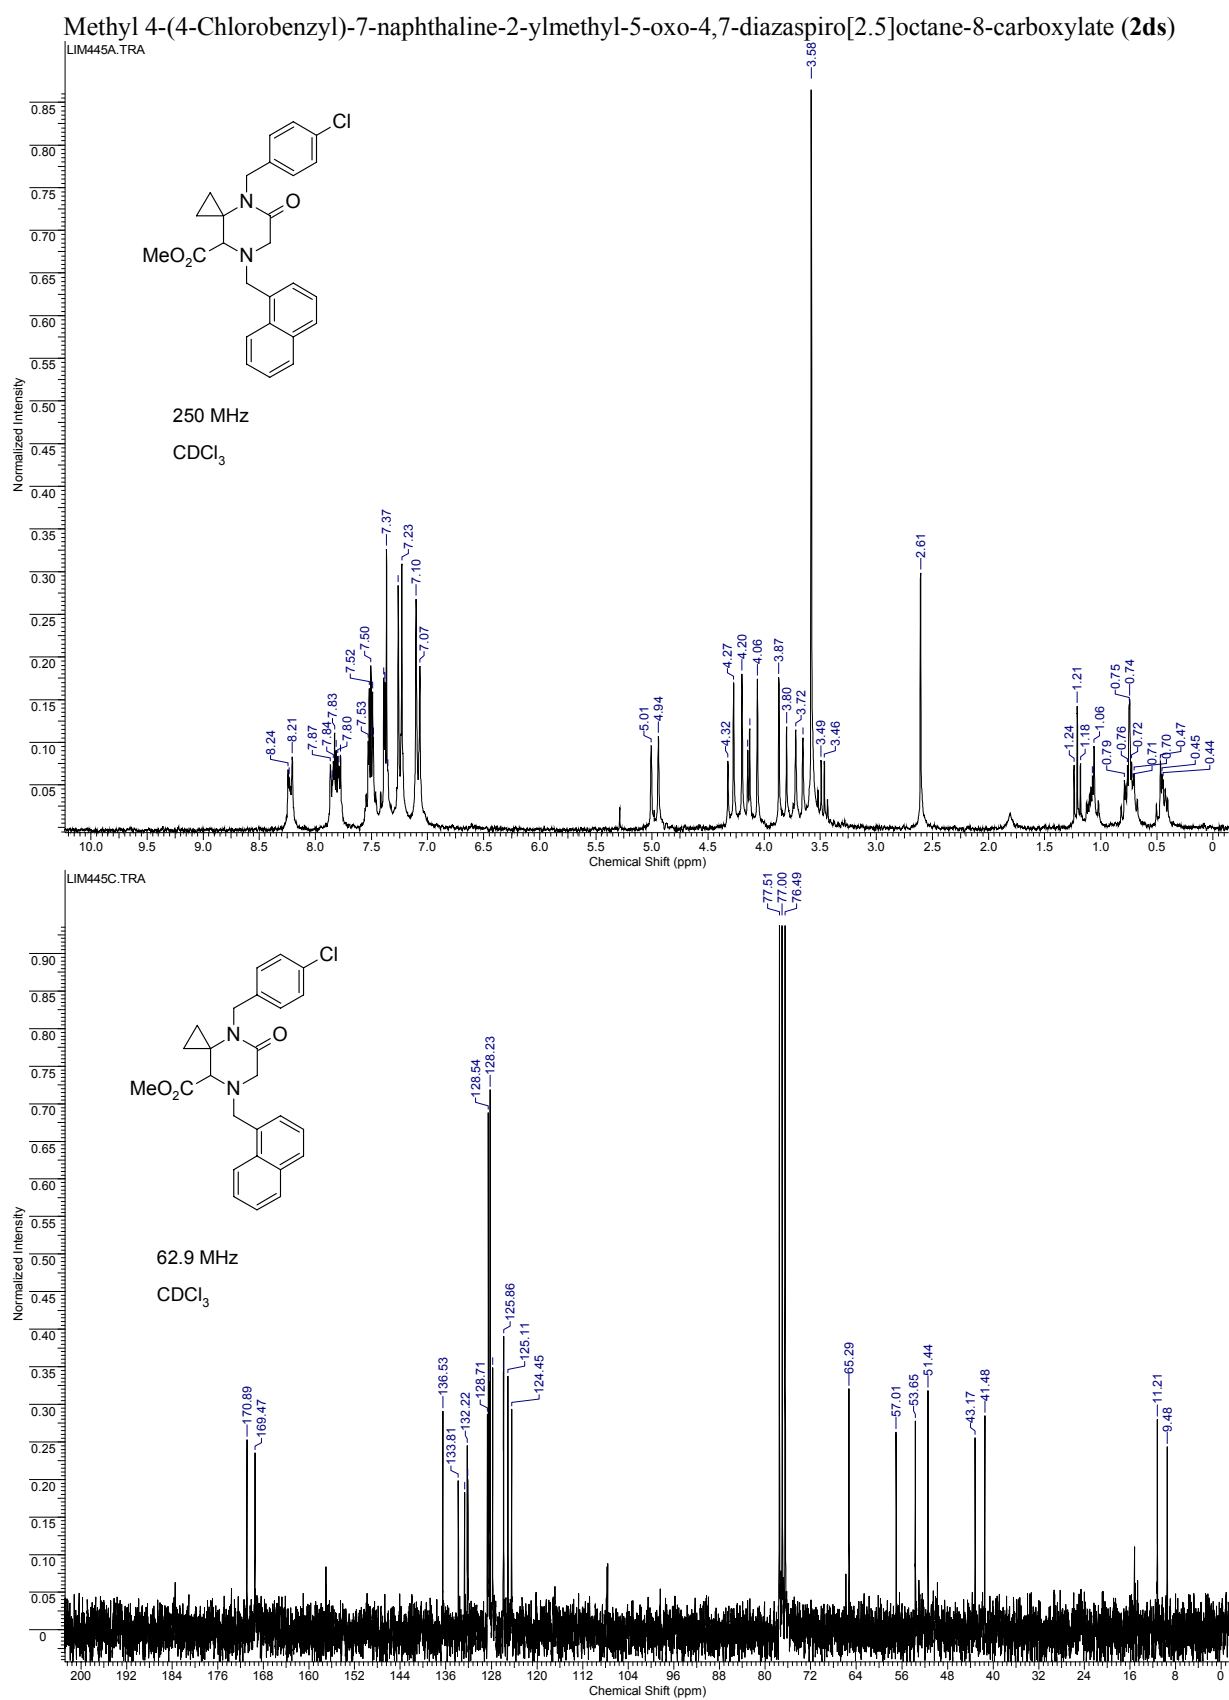



Supplementary Material (ESI) for Organic & Biomolecular Chemistry  
This journal is (c) The Royal Society of Chemistry 2009

Methyl 4-(4-Chlorobenzyl)-5-oxo-7-(4-chlorophenyl)-4,7-diazaspiro[2.5]octane-8-carboxylate (**2du**)

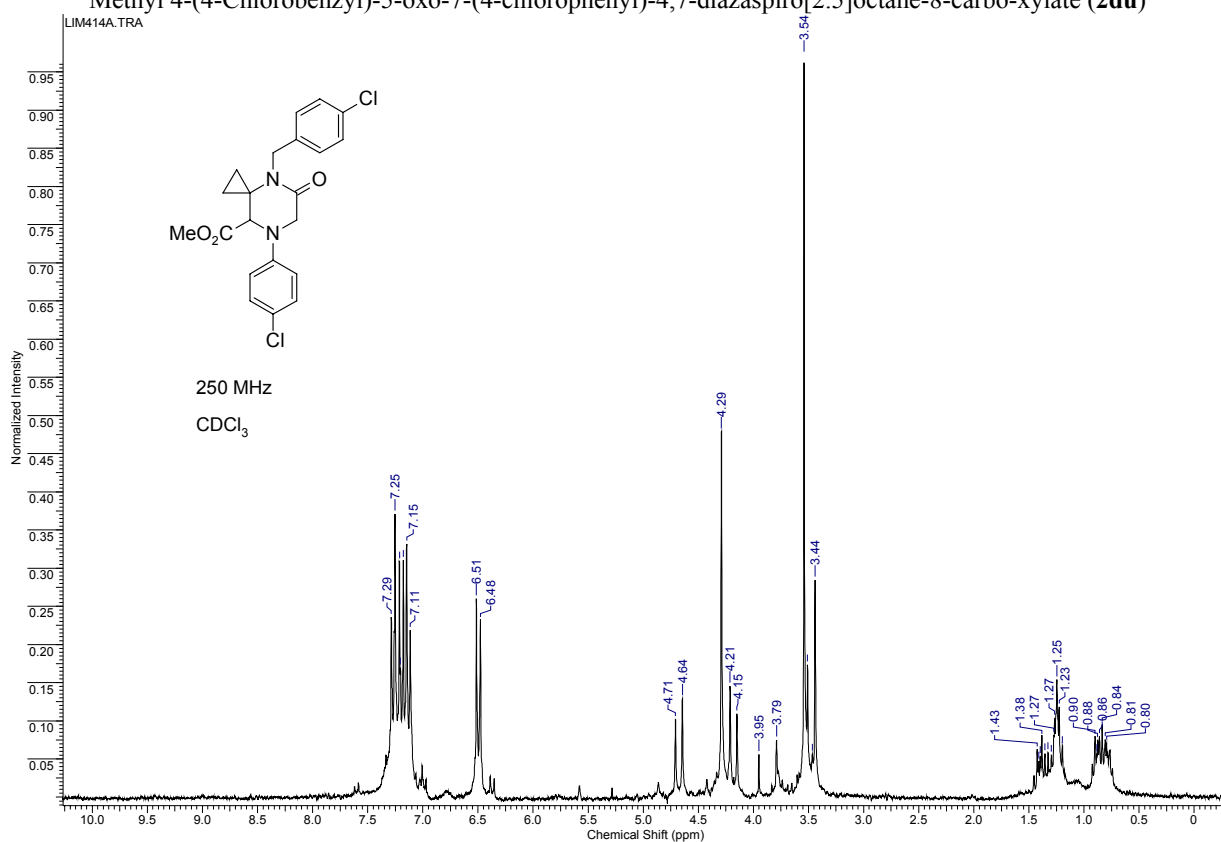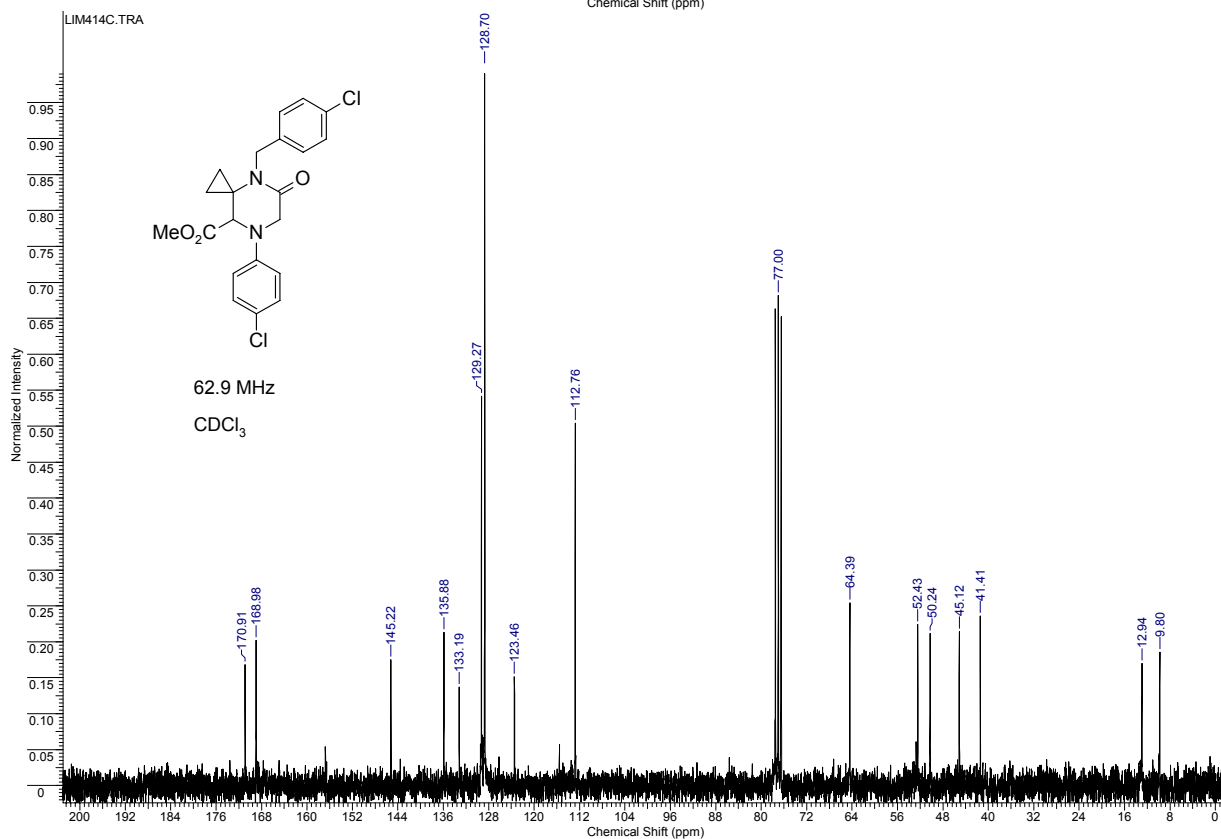

Supplement: b908548c.pdf [file b908548c.pdf]
